# Supplementary material for: Occurrence of Antimicrobial Resistance in the Environment in Germany, Austria, and Switzerland: A Narrative Review of Existing Evidence
Source: MDPI journal article supplement (doi:10.3390/microorganisms10040728), 2022-03-29
Supplement: s1 [file s1]

# Supplement

## Occurrence of antimicrobial resistance in the environment in Germany, Austria and Switzerland: a narrative review of existing evidence

Marina Treskova, Alexander Kuhlmann, Fritjof Freise, Lothar Kreienbrock and Sandra Brogden.

### Content

|                                                                                                               |    |
|---------------------------------------------------------------------------------------------------------------|----|
| 1. Methods.....                                                                                               | 2  |
| 1.1. Searches, literature screening, study selection and data extraction.....                                 | 2  |
| 1.1.1. Search syntax for EMBASE.....                                                                          | 2  |
| 1.1.2. Search syntax for CAB Abstracts .....                                                                  | 2  |
| 1.2. Study selection criteria.....                                                                            | 2  |
| 1.3. Data extraction .....                                                                                    | 3  |
| 1.4. Translation of reported antibiotic-resistance gene (ARG) to antibiotic compound or antibiotic class..... | 4  |
| 2. Included literature .....                                                                                  | 5  |
| 2.1. Results of the searches and study selection .....                                                        | 5  |
| 2.2. Overview of the included studies .....                                                                   | 6  |
| 2.3. Overview of the sampling strategies .....                                                                | 7  |
| 2.3.1. Antibiotic resistance in water sources.....                                                            | 7  |
| 2.3.2. Antibiotic resistance in wastewater.....                                                               | 7  |
| 2.3.3. Antibiotic resistance in the environment of animal husbandry .....                                     | 8  |
| 2.3.4. Antibiotic resistance in wildlife .....                                                                | 8  |
| 2.3.5. Antibiotic resistance in sediment and soil.....                                                        | 9  |
| 2.4. Results tables .....                                                                                     | 11 |
| 2.5. Excluded studies.....                                                                                    | 50 |

## 1. Methods

### 1.1. Searches, literature screening, study selection and data extraction

Two publication search engines, EMBASE (including Medline and Pubmed) and CAB Abstracts were used to identify peer-reviewed epidemiological studies, which explored occurrence of antibiotic resistance in the environment. The search syntaxes were used as described below.

#### 1.1.1. Search syntax for EMBASE

((antibiotic:ti,ab AND resistant:ti,ab) OR (antibiotic:ti,ab AND resistance:ti,ab) OR (anti\*:ti,ab AND resist\*:ti,ab) OR 'multi-drug-resistant':ti,ab)  
AND ('water':ti,ab OR 'waste':ti,ab OR 'sewage':ti,ab OR 'manure':ti,ab OR 'sludge':ti,ab OR 'environment':ti,ab OR 'soil':ti,ab OR soil\*:ti,ab OR environment\*:ti,ab OR 'land':ti,ab OR plant\*:ti,ab OR (human:ti,ab AND environment:ti,ab) OR (animal:ti,ab AND environment:ti,ab) OR (human:ti,ab AND water:ti,ab) OR (human:ti,ab AND soil:ti,ab) OR (hospital:ti,ab AND environment:ti,ab) OR (hospital:ti,ab AND water:ti,ab) OR (hospital:ti,ab AND soil:ti,ab) OR (livestock:ti,ab AND environment:ti,ab) OR (livestock:ti,ab AND soil:ti,ab) OR (livestock:ti,ab AND water:ti,ab) OR (industry:ti,ab AND environment:ti,ab) OR (industry:ti,ab AND soil:ti,ab) OR (industry:ti,ab AND water:ti,ab) OR (aquaculture:ti,ab AND environment:ti,ab) OR (aquaculture:ti,ab AND soil:ti,ab) OR (aquaculture:ti,ab AND water:ti,ab) OR (agriculture:ti,ab AND environment:ti,ab) OR (agriculture:ti,ab AND soil:ti,ab) OR (agriculture:ti,ab AND water:ti,ab)) AND ('germany':ti,ab OR 'switzerland':ti,ab OR 'austria':ti,ab) AND ([english]/lim OR [german]/lim) AND ([embase]/lim OR [medline]/lim OR [pubmed-not-medline]/lim)  
AND [2000-2021]/py  
ti,ab stands for "title and abstract"

#### 1.1.2. Search syntax for CAB Abstracts

(ab:( "antibiotic resistant" OR "antibiotic resistance")  
AND ab:(water OR waste OR sewage OR manure OR sludge OR environment OR soil OR land OR plant OR (human AND environment) OR (animal AND environment) OR (human AND water) OR (human AND soil) OR (hospital AND environment) OR (hospital AND water) OR (hospital AND soil) OR (livestock AND environment) OR (livestock AND soil) OR (livestock AND water) OR (industry AND environment) OR (industry AND soil) OR (industry AND water) OR (aquaculture AND environment) OR (aquaculture AND soil) OR (aquaculture AND water) OR (agriculture AND environment) OR (agriculture AND soil) OR (agriculture AND water))  
AND ab:(Germany OR Denmark OR France OR Netherlands OR Switzerland OR Austria))  
AND ( ((item-type:( "Journal article" ) ) ) )

The results of searches were exported into Endnote (X7.7). After the automatic removal of duplicates, titles and abstracts of the identified de-duplicated records were screened for inclusion.

### 1.2. Study selection criteria

The search was restricted to the epidemiological studies conducted in Austria, Germany, and Switzerland after the year 2000. Quantification of the environmental occurrence of chemical compounds known to be resistance drivers, such as antibiotics, biocides, and heavy metals, was outside the scope of this review.

For inclusion into this review, a paper has to meet the following criteria:

- i. Peer-reviewed original study

- ii. Investigates the occurrence of antibiotic resistance in the environment
  - Environment includes water bodies, wastewater, surface water, grey or reclaimed water, sewage, soil, land, and wildlife
  - Antibiotic resistance includes phenotypic or genotypic definition of resistance
- iii. Epidemiological study in terms of non-experimental study design
- iv. Report the results for the samples obtained in the environment
- v. Conducted in Germany, Switzerland or Austria or conducted research in multiple countries including Germany, Switzerland or Austria and report the results separately
- vi. English or German language
- vii. Published during 2000 - 2021

Study was excluded based on the following criteria:

- ii. Systematic review or meta-analysis
- iii. Experimental study
- iv. Investigates azole resistance of environmental and clinical *Aspergillus fumigatus*
- v. Does not investigate occurrence of antibiotic resistance
- vi. Investigate following reservoirs
  - Hospital environment
  - Food sources
  - Pets and veterinary clinic environment
  - The areas directly surrounding the farm animals or any other facility of food production chain (e.g. dust in slaughterhouse)
- vii. No samples from the environment were collected and examined
- viii. Focused only on humans, animals or interaction between humans and animals
- ix. Conducted outside of Germany, Switzerland and Austria
- x. Investigated or quantified the occurrence of resistance-driving chemical compounds including antibiotics, metals, genes and biocides
- xi. Published before 2000
- xii. Other than a peer-reviewed journal article
- xiii. Do not focus on the occurrence of antibiotic resistance
- xiv. Conference abstracts

### 1.3. Data extraction

To facilitate a narrative review, the following data were extracted from the identified studies to a predefined table: authors, year, journal, country, geographical location of samples origin, research focus, examined environment, sampling period, sampling strategy, targeted antibiotic-resistant bacteria

or antibiotic resistance genes, number of samples, number of isolates, reported occurrence of antibiotic resistance. Data were extracted using Microsoft Excel.

MTS conducted the literature search, the study selection, and data extraction followed the established review protocol. The study selection and data extraction were confirmed by the second reviewer (AK). Any disagreements were resolved via discussion with a third reviewer (LK).

#### 1.4. Translation of reported antibiotic-resistance gene (ARG) to antibiotic compound or antibiotic class

Table S1. Translation of reported antibiotic-resistance gene (ARG) to antibiotic compound or antibiotic class

| Reported ARG                                                                                                                  | Associated antibiotic class                              | Reference |
|-------------------------------------------------------------------------------------------------------------------------------|----------------------------------------------------------|-----------|
| <i>ampC</i>                                                                                                                   | Ampicillin, Class C $\beta$ -lactamases                  | [72,77]   |
| <i>bla-TEM</i>                                                                                                                | Class A $\beta$ -lactamases                              | [77]      |
| <i>blaACT-MIR</i>                                                                                                             | Class C $\beta$ -lactamases                              | [77]      |
| <i>blaCMY-2</i>                                                                                                               | Class C $\beta$ -lactamases                              | [77]      |
| <i>blaCTX-M</i> , <i>blaCTX-M-1</i> , <i>blaCTX-M-9</i> , <i>CTX-M-32</i>                                                     | Class A $\beta$ -lactamases                              | [77]      |
| <i>blaDHA</i>                                                                                                                 | $\beta$ -lactamases                                      | [77]      |
| <i>blaFOX</i>                                                                                                                 | $\beta$ -lactamases                                      | [77]      |
| <i>blaGES</i>                                                                                                                 | $\beta$ -lactamases                                      | [77]      |
| <i>blaOXA</i> , <i>blaOXA-48</i> , <i>blaOXA-58</i> , <i>intl1</i>                                                            | Class D $\beta$ -lactamases                              | [44,77]   |
| <i>blaSHV</i>                                                                                                                 | Class A $\beta$ -lactamases                              | [77]      |
| <i>blaVIM-1</i>                                                                                                               | Imipenem, Class B (metallo-) $\beta$ -lactamases         | [72,77]   |
| <i>ermB</i>                                                                                                                   | Erythromycin, Macrolides                                 | [72]      |
| <i>ermF</i>                                                                                                                   | Clindamycin, Streptogramins                              | [77]      |
| <i>mcr-1</i>                                                                                                                  | Colistin                                                 | [44]      |
| <i>nptII (aph(3')-IIa)</i> , <i>nptIII (aph(3')-IIIa)</i>                                                                     | Aminoglycoside                                           | [71]      |
| <i>qacE<math>\Delta</math>1</i>                                                                                               | Quaternary ammonium compounds, resistance to antiseptics | [53,77]   |
| <i>qnrA</i>                                                                                                                   | Fluoroquinolones                                         | [64]      |
| <i>sul1</i> , <i>sul2</i> , <i>sul3</i>                                                                                       | Sulfonamides                                             | [64,66]   |
| <i>tet(A)</i> , <i>tet(B)</i> , <i>tet(L)</i> , <i>tet(M)</i> , <i>tet(O)</i> , <i>tet(S)</i> , <i>tet(W)</i> , <i>tet(X)</i> | Tetracyclines                                            | [64,77]   |
| <i>vanA</i>                                                                                                                   | Vancomycin, Glycopeptides                                | [72,77]   |

## 2. Included literature

### 2.1. Results of the searches and study selection

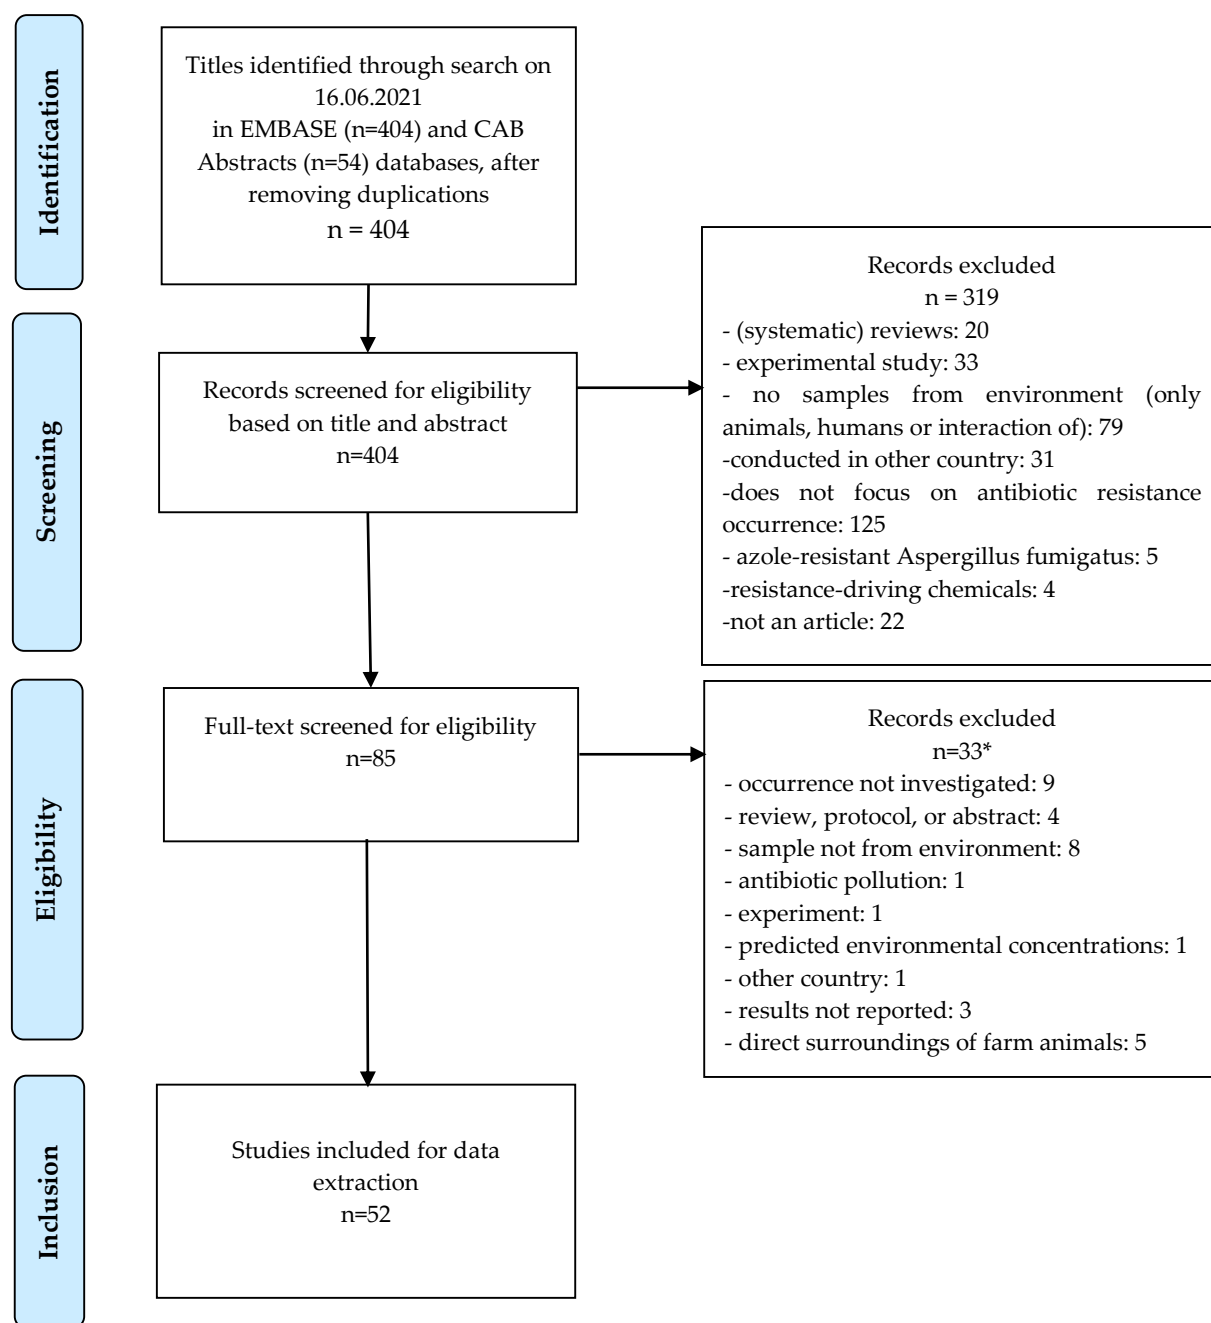

Figure S1. Results of the searches and study selection represented following the Prisma chart

\*33 records which were excluded after the full-text screening based on the selection criteria are reported in section 2.5 of this supplement

## 2.2. Overview of the included studies

### Austria

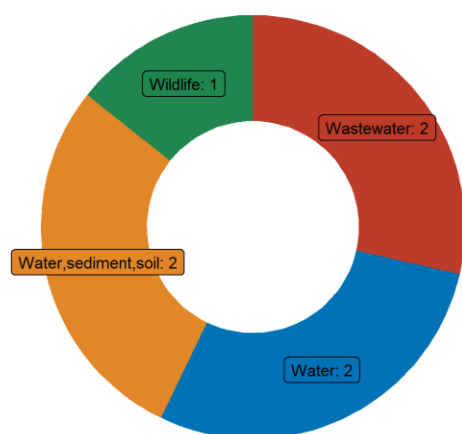

### Germany

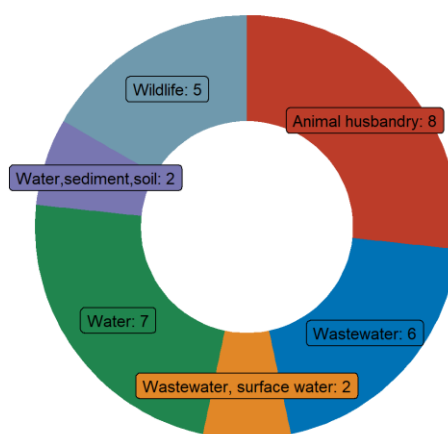

### Switzerland

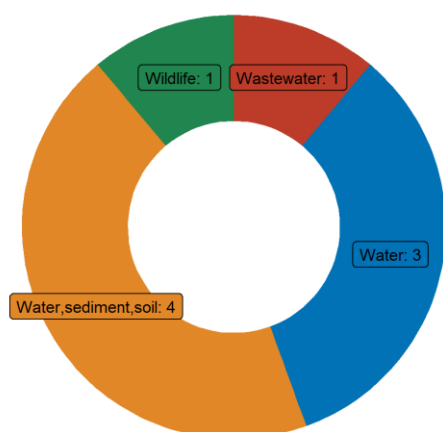

### Several countries

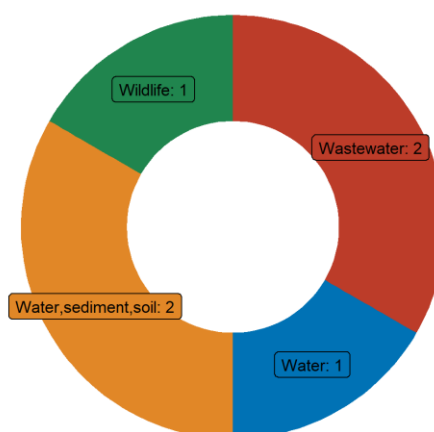

Figure S2. Number of studies by country and environment

### 2.3. Overview of the sampling strategies

In Germany, several environmental reservoirs were examined, including water, wastewater, wildlife, and animal husbandry. Two studies looked at different sources such as food chains and several environmental sources [72,73]. Out of 13 studies conducted between 2015 and 2020, seven examined water and wastewater, three studies analyzed wildlife, including wild boars, roe deer, wild ducks and geese, flies, and one each water and sediment, wastewater from a farm, food chain and environmental sources. Nine studies conducted sampling campaigns between 2010 and 2015 investigating water, animal husbandry, and wildlife. Out of five studies conducted before 2010, three investigated manure, one looked at wild rodents, and one at surface water. Additionally, three studies also investigated water sources but did not report the sampling period.

In Switzerland, mainly water and sediment were examined. Among the studies, which conducted sampling in 2015-2020, two studies examined water, one study analyzed sediment, and one study looked at wildlife, particularly wild birds. Among the earlier conducted studies ( $n = 3$ ), water and wastewater samples were analyzed. Two studies that investigated water and sediment did not report the sampling period.

In Austria, also mostly water was examined. Four studies reported analyses of water and wastewater. One study examined water and soil, one investigated soil only, and one studied two populations of rooks. All studies reported the sampling period. Three conducted sampling between 2010 and 2015, two in 2015-2020 and two before 2010.

#### 2.3.1. Antibiotic resistance in water sources.

In Germany and Austria, the waters of rivers Rhine [29,31], Danube [25,31], Glan [25], Inn [25], Traun [25], Swist [27], Lahn [24], Weser [28], and Mur [34] were sampled for resistance-related analyses. Among these seven studies, only two studies conducted a relatively broad investigation of antibiotic resistance in surface water. Stoll et al. [31] studied the presence of antibiotic resistance genes against eight antibiotic classes in rivers Rhine and Danube. In addition, Stange et al. [29] analyzed the waters of river Rhine to detect the presence of antibiotic resistance genes against ten antibiotic compounds, coliform and *E. coli* bacteria which indicated fecal pollution in the aquatic environments. The other five studies conducted more targeted analyses. Schreiber et al. [27] explored resistance of environmental Rhodospirillaceae to antibiotics used in human medicine in the waters of river Swist in Germany. Lepuschitz et al. [25] aimed to identify methicillin-resistant *Staphylococcus aureus* (MRSA) in the waters of rivers Danube, Glan, Inn and Traun in Austria. The presence of blaCTX-M as a potential indicator of resistance spread in the waters of river Lahn in Germany was investigated by Herrig et al. [24]. Zarfel et al. [34] screened the waters of river Mur in Austria for the presence of extended-spectrum beta-lactamases and carbapenemases harboring Enterobacteriaceae. Another study [28] looked at microplastics as a potential mode of spread of multidrug-resistant (MDR) *E. coli* in the water of river Weser in Germany.

The bathing waters were analyzed in a study conducted in North Rhine-Westphalia [23] in Germany. Döhla et al. [23] conducted a broader analysis of antibiotic resistance, aiming to identify the presence of ARBs and ARGs in bathing waters.

Three studies in Switzerland investigated waters of lakes and inland streams [22,26,33] with a focus on the presence of carbapenemase-producing Enterobacteriaceae [22], antibiotic resistance patterns of *E. coli* [33], and qnr genes among *Aeromonas* spp. strains [26]. Spring and drinking waters were analyzed in two studies in Germany [30,32], which investigated the presence of clinically relevant ARBs and ARGs.

#### 2.3.2. Antibiotic resistance in wastewater

Agrawal et al. [35] compared the occurrence and fate of ARGs between a pond system in Namibia and an advanced activated sludge system in Germany. In another German study, Alexander et al. (2020) [36] investigated daily discharges of different ARGs and bacteria in effluents released from several WWTP clusters, including communal, food production, slaughter house wastewater, and hospital discharge. Alygizakis et al. [37] overviewed effluent wastewater discharged into the Danube River and its tributaries and conducted the sampling in multiple sites in nine different countries, including Austria

and Germany. Bäumlisberger et al. [38] analyzed the presence of antibiotic resistance genes in wastewater upstream and downstream from a non-hospital medical care facility, i.e. a nursing home located in southwest Germany. Klees et al. [73] explored the spread of multidrug-resistant bacteria at different stages of food production and in the environment and quantified the prevalence of various resistance profiles of the included pathogens across different sources, including sludge and sewage. Alexander et al. (2015) [72] investigated the dissemination of ARGs and opportunistic bacteria in different water environments, including hospital wastewater and municipal WWTP.

Biggel et al. [39] focused on resistance against fosfomycin (critically important phosphonic acid derivative). They examined wastewater in Switzerland to study the complete sequences of fosA-carrying plasmids isolated from *E. coli* and *Klebsiella* spp. coming from food and environmental sources. In Austrian studies, Galler et al. [40] screened for multidrug-resistant pathogens in activated sludge, and Reinthaler et al. [43] evaluated resistance patterns of *E. coli* isolated from samples of sewage, sludge and receiving waters from three sewage treatment plants. In other four German studies, wastewater samples were examined for the presence of various resistance patterns. Hembach et al. [41] screened wastewater from seven WWTPs different in their catchment area and population for the presence of resistance gene *mcr-1*, which mediated resistance against colistin (critically important of highest priority polymyxin). Schages et al. [44] also looked at *mrc* and beta-lactamase genes in wastewater. They studied the seasonal variation of the gene concentrations in sewage sludge and effluent water of a secondary WWTP. Müller et al. [42] investigated the presence and the spread of multidrug-resistant and extensively drug-resistant (defined as resistant to at least one antibiotic in all but two or less antibiotic classes) carbapenemase-producing Gram-negative bacteria originated from hospitals to wastewater. The researchers analyzed wastewater discharged from hospitals, inflow to a receiving municipal WWTP and WWTP effluent, receiving river water upstream and downstream from WWTP. Therefore, they explored possible dissemination of the bacteria from hospital buildings to surface waters in the area. Schmiede et al. [45] also explored the presence of multidrug-resistant ESBL-producing *E. coli* in community wastewater which stemmed from socio-spatially different districts.

### 2.3.3. Antibiotic resistance in the environment of animal husbandry

Wolters et al. [53] evaluated the connection between antibiotic use and antibiotic residues to the presence of resistance genes and mobile genetic elements in organic fertilizers obtained from pig manures. Savin et al. [50] investigated the occurrence and characteristics of antimicrobial-resistant bacteria in the different types of wastewater from poultry husbandry and processing.

Binh et al. [46] analyzed samples of piggery manure originating from 15 different pig farms (nationwide) and explored the presence and types of plasmids that can function as shuttles of antibiotic resistance genes.

Two studies [47,48] used bacteria obtained from the samples previously collected within a national ESBL-surveillance project RESET ([www.reset-verbund.de](http://www.reset-verbund.de)), which examined pig farms in Germany. The samples included environmental swabs, manure, flies, mice feces, and dogs feces. Fischer et al. [47] retrospectively looked at the spread of blaVIM-1 positive isolates of *E. coli* and *Salmonella* Infantis in carbapenemase-positive pig farms. Guenther et al. [48], in turn, studied the distribution of *mcr-1*-harboring *E. coli* in the environment of pig farms.

Two studies were conducted in the Bavaria region. Hölzel et al. [49] investigated the presence and antibiotic resistance of *Salmonella* spp. in liquid manure in pig farms. Schwaiger et al. [52] also analyzed liquid manure samples from pig farms to describe how contamination of the environment with antibiotics influences the occurrence of phenotypic and genetic resistance.

Schoenfelder et al. [51] conducted a study in North Rhine-Westphalia and Lower Saxony regions using dust and manure samples. The authors screened for coagulase-negative staphylococci, methicillin- susceptible *Staphylococcus aureus* (MSSA) and MRSA to assess their potential for harboring antibiotic resistance genes.

### 2.3.4. Antibiotic resistance in wildlife

Within a monitoring program, Plaza-Rodríguez et al. [57] investigated the presence and resistance of five bacterial species in wild boars, roe deer, wild ducks and geese in Germany on the nationwide scale. The targeted bacterial species included *Salmonella* spp. (in wild boars and wild ducks and geese),

*Campylobacter* spp. (in roe deer and wild ducks and geese), Shiga toxin-producing *E. coli*, commensal *E. coli* and ESBL- or ampicillinase class C beta-lactamase-producing *E. coli* in all animals, and MRSA in wild boars. The study was incorporated within an existing program. The geographical location of origin of the animals was not reported. The types of samples varied and included fecal samples, nasal swabs, and cadaver samples. The resistance of the isolates was tested against 14 substance classes: gentamicin, chloramphenicol, cefotaxime, ceftazidime, nalidixic acid, ciprofloxacin, ampicillin, colistin, sulfamethoxazole, trimethoprim, tetracycline, azithromycin, meropenem, tigecycline.

Other studies considered one animal species only and provided more restricted analyses. One study in each country, Austria, Germany and Switzerland, investigated wild birds. In Austria, Loncaric et al. [56] examined migratory and resident populations of rooks (*Corvus frugilegus*) as a potential indicator of the spread of antibiotics and resistance in their habitats. The authors screened for the occurrence of beta-lactamase-producing *Enterobacteriaceae*, MRSA and cefotaxime-resistance in the fecal samples. In Switzerland, Zurfluh et al. [61] analyzed fecal samples of wild birds admitted to a care center for the presence of antibiotic-resistant *E. coli* with resistance to third-generation cephalosporins, carbapenems, aminoglycosides, and colistin. In Germany, Schaufler et al. [59] looked at the presence of clinically relevant ESBL-producing *E. coli* in wild birds in Berlin. The authors investigated the cloacal swabs of rescued birds of around 40 different species.

Other three studies conducted in Germany examined one each wild boars, wild rodents and flies. Reinhardt et al. [58] investigated the tonsils of hunted wild boars for the occurrence and resistance of *Yersinia pseudotuberculosis*. Eight wild rodent species and one shrew species in rural areas were examined for the presence of antibiotic-resistant *E. coli* in the study by Guenther et al. [54]. The isolates were tested for resistance against beta-lactams, tetracyclines, aminoglycosides and sulfonamides. Wetzker et al. [60] also examined the presence of ESBL-producing *E. coli* but used flies collected in an urban center as an indicator.

Loncaric et al. [55] examined the presence of beta-lactamase-producing and fluoroquinolone-resistant *Enterobacteriaceae* in fecal samples of the European mouflons (*Ovis orientalis musimon*) in Austria and Germany.

### 2.3.5. Antibiotic resistance in sediment and soil

Four Swiss studies examined sediment samples in a more general explorative approach [63,64,66,68]. Czekalski et al. (2012) [63] investigated samples from different sources obtained in Vidy Bay, Lake Geneva, including sediment close to a WWTP and drinking water pump, wastewater effluents and freshwater. The authors conducted this study to assess whether WWTP can provide an environment for selecting multidrug-resistant bacteria and horizontal transfer of resistance. In a later study, Czekalski et al. (2014) [64] analyzed samples of sediment cores at 22 sites of Lake Geneva to investigate the spatial distribution and abundance of different ARGs, such as *sul1*, *sul2*, *tet(B)*, *tet(M)*, *tet(W)* and *qnrA*. Thevenon et al. [68] looked at Vidy Bay and the Creux de Genthod region and examined sediment samples originating from a site close to WWTP outlet pipes and coast. The authors aimed to quantify the presence and distribution of multidrug-resistant bacteria, fecal indicator bacteria, and ARGs. Laffite et al. [66] looked at the sediment of another freshwater lake in Switzerland, Lake Brêt, and evaluated the concentration of beta-lactam and sulfonamide resistance genes: *bla<sub>TEM</sub>*, *bla<sub>SHV</sub>*, *bla<sub>CTX-M</sub>*, *bla<sub>NDM</sub>*, *sul1*, and *sul2*. In Germany, Reichert et al. [67] evaluated different strategies to monitor the presence of antibiotic-resistant bacteria in rivers. For the study, the authors took different samples, including surface water, sediment, and biofilm, and analyzed them for 13 ARGs and gene markers of facultative pathogenic bacteria. The other two studies had a more focused approach. Devarajan et al. [65] examined the spread of antibiotic-resistant *Pseudomonas* spp. in sediments of aquatic environments in Switzerland, Democratic Republic of the Congo and India. In a German study, Bier et al. [62] examined *Vibrio vulnificus* and *Vibrio cholerae* non-O1/non-O139 isolates obtained from coastal water, sediment, bivalve molluscs of the Baltic Sea and North Seas for antimicrobial resistance patterns.

Three studies that investigated soil conducted comparatively specific analyses. Malik et al. [70] in the samples of soil obtained from Berlin Tiergarten, an urban park, and an abandoned sewage field in Berlin and India and quantified the presence of plasmids of incompatibility groups: IncP, IncN, IncW, and IncQ. The other two studies were conducted in Austria. Woegerbauer et al. [71] sampled the soil from 50 maize fields and 50 potato fields and analyzed the presence of *aph(30)-IIa/nptII* and *aph(30)-*

IIIa/nptIII ARGs, which are associated with plant biotechnology and resistance to aminoglycosides. Linke et al. [69] investigated the occurrence of *Listeria monocytogenes* in the samples of water and soils with different compositions.

## 2.4. Results tables

Table S2. Overview of the included studies (n=52).

| First author               | Year | Country                                   | Locality                                                      | Research focus                                                                                              | Environmental source                                                                                             | Sampling period          |
|----------------------------|------|-------------------------------------------|---------------------------------------------------------------|-------------------------------------------------------------------------------------------------------------|------------------------------------------------------------------------------------------------------------------|--------------------------|
| Agrawal et al.[35]         | 2020 | Germany (and Namibia)                     | not reported                                                  | Occurrence and fate of ARGs                                                                                 | WWTP (activated sludge system)                                                                                   | not reported             |
| Alexander et al.[36]       | 2020 | Germany                                   | not reported                                                  | Daily discharges of ARGs and FPB in effluents                                                               | Conventionally treated WWTP effluents                                                                            | Feb - Nov 2018           |
| Alexander et al. [72]      | 2015 | Germany                                   | not reported                                                  | Dissemination of ARGs and opportunistic bacteria in different anthropogenically influenced aquatic habitats | Hospital wastewater, municipal WWTP (influent, effluent), river surface water, rain overflow basins, groundwater | 2 years, not reported    |
| Alygizakis et al. [37]     | 2019 | 9 countries including Germany and Austria | The Danube River Basin. Germany: Augsburg. Austria: Amstetten | Overview of effluent wastewater released into the Danube River                                              | WWTP on the Danube River Basin, mainly of industrial wastewater                                                  | Aug, Sep 2017            |
| Bäumliberger et al. [38]   | 2015 | Germany                                   | South-west Germany                                            | Taxonomic composition and content of resistance determinants in wastewater                                  | Non-hospital medical care facility wastewater                                                                    | Nov 2012 - Mar 2013      |
| Bier et al. [62]           | 2015 | Germany                                   | Baltic Sea and North Sea                                      | Resistance of <i>Vibrio vulnificus</i> and <i>Vibrio cholerae</i> non-O1/non-O139                           | Coastal water, sediment, bivalve molluscs                                                                        | 2004 - 2012; 2009 - 2014 |
| Biggel et al. [39]         | 2021 | Switzerland                               | multiple                                                      | Complete sequences of 13 fosA1 plasmids, fosfomycin resistance                                              | A hospital-associated WWTP; rural and urban surface water                                                        | 2012 - 2019              |
| Binh et al. [46]           | 2008 | Germany                                   | Nationwide                                                    | Occurrence and types of plasmids functioning as shuttles of ARGs                                            | Piggery manure; manure storage tanks of 15 farms                                                                 | May - Jun 2006           |
| Bleichenbacher et al. [22] | 2020 | Switzerland                               | not reported                                                  | Occurrence in river water                                                                                   | Rivers, inland canals, and streams                                                                               | May - Aug 2019           |
| Czekalski et al. [64]      | 2014 | Switzerland                               | Vidy Bay, Lake Geneva                                         | Spatial distribution of different ARGs                                                                      | Freshwater lake sediments                                                                                        | Aug 2011                 |

|                       |      |                                                       |                                                                       |                                                                                                                                                                                                      |                                                                                                                                                         |                     |
|-----------------------|------|-------------------------------------------------------|-----------------------------------------------------------------------|------------------------------------------------------------------------------------------------------------------------------------------------------------------------------------------------------|---------------------------------------------------------------------------------------------------------------------------------------------------------|---------------------|
| Czekalski et al. [63] | 2012 | Switzerland                                           | Lake Geneva Vidy Bay, Lausanne                                        | WWTP as a barrier for MRB in the wastewater stream or as an environment for selection of MRB and horizontal transfer of resistance factors. Role of the lake as a potential reservoir of ARB and ARG | Hospital and municipal raw sewage, treated effluent from Lausanne's WWTP, lake water, sediment samples close to WWTP and close to a drinking water pump | not reported        |
| Devarajan et al. [65] | 2017 | Switzerland (Democratic Republic of the Congo, India) | Vidy Bay, Lake Geneva                                                 | Antibiotic resistant <i>Pseudomonas spp.</i> in the aquatic environment in different climate conditions: tropical and temperate                                                                      | Sediments                                                                                                                                               | May 2012            |
| Döhla et al. [23]     | 2020 | Germany                                               | North Rhine-Westphalia                                                | Presence of resistance in bathing water, development of a tool to support prevention measures                                                                                                        | Bathing waters                                                                                                                                          | May - Sep 2018      |
| Fischer et al. [47]   | 2017 | Germany                                               | not reported                                                          | Distribution of <i>VIM-1</i> -positive isolates in any of the carbapenemase-positive swine farms                                                                                                     | Environmental swabs, manure, flies, mice faeces, farmers dogs' faeces                                                                                   | 2011-2012           |
| Galler et al. [40]    | 2018 | Austria                                               | Area of Graz, Styria                                                  | Multi-resistant pathogens in WWTP                                                                                                                                                                    | Activated sludge                                                                                                                                        | Sep 2011 - Feb 2012 |
| Guenther et al. [54]  | 2010 | Germany                                               | Bavaria, Mecklenburg-Pomerania, Saxony-Anhalt, Saxony and Brandenburg | Antimicrobial resistance status of <i>E. coli</i> in wild small mammals in rural areas (a pilot study)                                                                                               | Wild rodents in rural areas                                                                                                                             | 2007 - 2008         |
| Guenther et al. [48]  | 2017 | Germany                                               | not reported                                                          | Environment surrounding the farms as source for mcr-1-positive strains                                                                                                                               | Boot swabs, flies, dog faeces and manure                                                                                                                | 2011 - 2012         |
| Hembach et al. [41]   | 2017 | Germany                                               | not reported                                                          | Presence of the colistin resistance gene mcr-1                                                                                                                                                       | WWTP                                                                                                                                                    | not reported        |
| Herrig et al. [24]    | 2020 | Germany                                               | Lower Lahn River                                                      | ARG dynamics in effluent receiving surface waters and the contribution of faecal pollution sources                                                                                                   | Surface water                                                                                                                                           | Oct 2011 - Dec 2012 |

|                        |      |                  |                                                                                                                                         |                                                                                                                                                                     |                                                                                                                     |                           |
|------------------------|------|------------------|-----------------------------------------------------------------------------------------------------------------------------------------|---------------------------------------------------------------------------------------------------------------------------------------------------------------------|---------------------------------------------------------------------------------------------------------------------|---------------------------|
| Hölzel et al. [49]     | 2008 | Germany          | Bavaria                                                                                                                                 | Presence of <i>Salmonella</i> spp. in liquid manure                                                                                                                 | Manure samples                                                                                                      | Autumn 2002 - Spring 2003 |
| Klees et al. [73]      | 2020 | Germany          | East Westphalia-Lippe                                                                                                                   | Presence of MRB within the meat production chain                                                                                                                    | 4 stages of meat production: slaughterhouses, meat-processing plants, fresh food products and the urban environment | 2018 - 2019               |
| Laffite et al. [66]    | 2020 | Switzerland      | Lake Brêt                                                                                                                               | Impact of the catchment agricultural practices on the accumulation of ARGs in surface sediment                                                                      | Sediments from Lake Brêt used as drinking-water reservoir                                                           | Sep 2017                  |
| Lepuschitz et al. [25] | 2018 | Austria          | four rivers: Danube, Glan, Inn, Traun                                                                                                   | Presence of MRSA USA300 strain in river water, phylogenetic relatedness to clinical CA-MRSA USA300 isolates                                                         | Surface water, bathing water                                                                                        | 2016                      |
| Linke et al. [69]      | 2014 | Austria          | Rax, Regelsbrunn                                                                                                                        | Occurrence of <i>L. monocytogenes</i> in soil from areas with different soil compositions                                                                           | Soil and water                                                                                                      | 2007 - 2009               |
| Loncaric et al. [55]   | 2016 | Austria, Germany | Öttingen, Kössingen (Germany); Vienna, Miesenbach, Rohr-Gebirge, Orth an der Donau, Schützen, Klein-Rust, Eggenburg, Zell-See (Austria) | Presence of beta-lactamase producing or fluoroquinolone-resistant <i>Enterobacteriaceae</i> in European mouflons                                                    | Mouflons ( <i>Ovis orientalis musimon</i> )                                                                         | Mar 2012 - Jan 2016       |
| Loncaric et al. [56]   | 2013 | Austria          | Lobau and Wulkaprodersdorf                                                                                                              | Rooks ( <i>Corvus frugilegus</i> ) as indicators for the potential circulation of antibiotics in the native habitat                                                 | Rooks ( <i>Corvus frugilegus</i> ) 2 populations: migratory and a resident population.                              | Mar 2013                  |
| Malik et al. [70]      | 2008 | Germany, India   | The urban park Berlin Tiergarten and the abandoned sewage field Berlin-Buch                                                             | Detection of plasmid specific sequences from prevalent plasmid Inc groups and on the detection of the antibiotic resistance gene pool in wastewater irrigated soils | Soil under anthropogenic influences and soil which used to be under wastewater application                          | not reported              |
| Müller et al. [42]     | 2018 | Germany          | North-Rhine Westphalia, small river in the western part of Germany                                                                      | Spread of MDR and XDR Gram-negative bacteria from hospitals to environment                                                                                          | Clinical/urban wastewater, surface river water                                                                      | Sep 2016 -Jul 2017        |

|                             |      |             |                                            |                                                                                                                     |                                                                                                                                                                                                              |                                                                |
|-----------------------------|------|-------------|--------------------------------------------|---------------------------------------------------------------------------------------------------------------------|--------------------------------------------------------------------------------------------------------------------------------------------------------------------------------------------------------------|----------------------------------------------------------------|
| Picão et al. [26]           | 2008 | Switzerland | The southern part                          | Spread of <i>qnr</i> genes among <i>Aeromonas</i> spp. In rivers and lakes in the Swiss Alps                        | Lake water                                                                                                                                                                                                   | 2002 - 2005                                                    |
| Plaza-Rodríguez et al. [57] | 2020 | Germany     | Nationwide                                 | Antibiotic resistance patterns in wild animals                                                                      | Wild boars ( <i>Sus scrofa</i> ), roe deer ( <i>Capreolus capreolus</i> ), wild ducks (family <i>Anatidae</i> , subfamily <i>Anatinae</i> ) and geese (family <i>Anatidae</i> , subfamily <i>Anserinae</i> ) | 2016 (wild boar), 2017 (roe deer), 2019 (wild ducks and geese) |
| Reichert et al. [67]        | 2021 | Germany     | The Kraichbach River, Baden-Württemberg    | Different monitoring strategies for antibiotic-resistant bacteria in rivers                                         | WWTP-impacted river in surface water, sediment, and biofilm. The river is the effluent receptor of 6 WWTPs                                                                                                   | Feb - Jun 2019                                                 |
| Reinhardt et al. [58]       | 2018 | Germany     | Brandenburg, Mecklenburg-Western Pomerania | Prevalence of <i>Yersinia pseudotuberculosis</i> in wild boars                                                      | Wild boars                                                                                                                                                                                                   | Feb 2015 - Dec 2016                                            |
| Reinthal et al. [43]        | 2003 | Austria     | Southern Austria                           | Resistance patterns of <i>E. coli</i> in WWTPs                                                                      | Sewage, sludge and receiving waters from 3 different sewage treatment plants                                                                                                                                 | Apr-Sep 2000                                                   |
| Savin et al. [50]           | 2020 | Germany     | not reported                               | Occurrence and characteristics of ARB in the wastewater of poultry slaughterhouses                                  | Process water from delivery and unclean areas, wastewater from the in-house WWTP                                                                                                                             | Dec 2016 - Sep 2018                                            |
| Schages et al. [44]         | 2020 | Germany     | District of Kleve                          | Impact of temperature on the variation of beta-lactamase and <i>mcr</i> genes in a WWTP                             | Wastewater, sewage sludge and effluent water; secondary WWTP                                                                                                                                                 | May 2018 - Apr 2019                                            |
| Schaufler et al. [59]       | 2016 | Germany     | Berlin                                     | Occurrence of clonal or closely related antimicrobial-resistant clinically relevant <i>E. coli</i> in wild birds    | Rescued wild birds                                                                                                                                                                                           | 2011 - 2014                                                    |
| Schmiege et al. [45]        | 2021 | Germany     | The Ruhr Metropolis                        | Presence of MRGN and ESBL-producing <i>E. coli</i> in community wastewater from socio-spatially different districts | Community wastewater, in-patient health care facility, WWTP                                                                                                                                                  | Apr 2019-Mar 2020                                              |
| Schoenfelder et al. [51]    | 2017 | Germany     | North Rhine-Westphalia, Lower Saxony       | Potential of coagulase-negative staphylococci (CoNS) and <i>S. aureus</i> as putative reservoirs for ARGs           | Dust and manure samples                                                                                                                                                                                      | Feb 2013 - Sep 2013                                            |

|                         |      |                         |                                                              |                                                                                                                  |                                                                                                             |                           |
|-------------------------|------|-------------------------|--------------------------------------------------------------|------------------------------------------------------------------------------------------------------------------|-------------------------------------------------------------------------------------------------------------|---------------------------|
| Schreiber et al. [27]   | 2013 | Germany                 | River Swist                                                  | Resistance of environmental <i>Rhodospirillaceae</i> to antibiotics used in human medicine                       | Wastewater samples; water samples from upstream and downstream from STP sites, water samples from tributary | not reported              |
| Schwaiger et al. [52]   | 2009 | Germany                 | Bavaria                                                      | Impact of antibiotic contaminated environment on microorganisms on both a phenotypic and a genetic level         | Liquid manure samples from pig farms                                                                        | Autumn 2002 - Spring 2003 |
| Song et al. [28]        | 2020 | Germany                 | River Weser                                                  | Colonization of synthetic and natural particles by ESBL-producing <i>E. coli</i>                                 | Surface water                                                                                               | Jul - Sep 2018            |
| Stange et al. [29]      | 2016 | Germany                 | River Rhine                                                  | Occurrence of ARGs, integrons and virulence genes in coliform and <i>E. coli</i> bacteria in river water         | Surface water                                                                                               | Jun 2006 - Jun 2007       |
| Stange et al. [30]      | 2020 | Germany                 | South-western Germany, Gallusquelle                          | Microbiological contamination of the spring water                                                                | Ground water, spring water                                                                                  | Mar 2012 - Jun 2013       |
| Stoll et al. [31]       | 2012 | Germany (and Australia) | Rivers Rhine and Danube                                      | Occurrence of ARGs in river waters                                                                               | Surface water                                                                                               | not reported              |
| Thevenon et al. [68]    | 2012 | Switzerland             | Lake Geneva: The Bay of Vidy and the Creux de Genthod region | Presence and distribution of faecal indicator bacteria and ARGs                                                  | Sediment                                                                                                    | not reported              |
| Voigt et al. [32]       | 2020 | Germany                 | Drinking water reservoir                                     | Occurrence in surface water                                                                                      | Drinking water                                                                                              | Aug 2018 - Jun 2019       |
| Wetzker et al. [60]     | 2019 | Germany                 | Berlin, urban centre                                         | Data on the current prevalence of ESBL-producing <i>E. coli</i> in flies                                         | Flies                                                                                                       | July 2016                 |
| Wicki et al. [33]       | 2011 | Switzerland             | North-western, Lützel stream                                 | Faecal contamination of spring water, localizing possible input sites for contaminants                           | Spring water, surface water                                                                                 | Mar - Sep 2009            |
| Woegerbauer et al. [71] | 2015 | Austria                 | Maize and potato growing regions                             | Presence of <i>aph(30)-IIa/nptII</i> and <i>aph(30)-IIIa/nptIII</i> genes                                        | Agricultural soils                                                                                          | Aug - Sep 2011            |
| Wolters et al. [53]     | 2016 | Germany                 | Lower Saxony                                                 | Link between antibiotic usage and antibiotic residues to ARGs and mobile genetic elements in organic fertilizers | Pig manures, 8 pig fattening and 6 pig breeding farms. Digestates from 8 biogas plants                      | Autumn 2012               |
| Zarfel et al. [34]      | 2017 | Austria                 | The River Mur (Graz)                                         | Presence and diversity (on the genetic and phenotypic levels)                                                    | Surface water                                                                                               | Oct 2015 - Jan 2016       |

|                     |      |             |         |                                                                                                                                                      |                                                                   |                |
|---------------------|------|-------------|---------|------------------------------------------------------------------------------------------------------------------------------------------------------|-------------------------------------------------------------------|----------------|
| Zurfluh et al. [61] | 2019 | Switzerland | Sempach | <i>Enterobacteriaceae</i> with transmissible resistance to third-generation cephalosporins, carbapenems, aminoglycosides, and colistin in wild birds | Wild birds admitted to the care centre, the rehabilitation centre | May - Oct 2018 |
|---------------------|------|-------------|---------|------------------------------------------------------------------------------------------------------------------------------------------------------|-------------------------------------------------------------------|----------------|

Table S3. Presence of antibiotic resistance or antibiotic resistance genes in water bodies as reported in the included studies (n = 13)

| Source                                                                                                                             | Samples                                                                                                                                                                 | Target                                                  | Reported ARB, ARGs presence                                                                                                                                                                                                                                                                                                                                                                                       | Refs                                    |
|------------------------------------------------------------------------------------------------------------------------------------|-------------------------------------------------------------------------------------------------------------------------------------------------------------------------|---------------------------------------------------------|-------------------------------------------------------------------------------------------------------------------------------------------------------------------------------------------------------------------------------------------------------------------------------------------------------------------------------------------------------------------------------------------------------------------|-----------------------------------------|
| Locality: not reported.<br>Source: Rivers, inland canals, and streams                                                              | Period: May-Aug 2019.<br>Sampling: 500 mL surface samples. Number of samples: 164. Number of isolates: not reported                                                     | carbapenemase producing <i>Enterobacteriaceae</i> (CPE) | CPE included 12 <i>E. coli</i> , one <i>Citrobacter freundii</i> , one <i>Enterobacter kobei</i> , one <i>Klebsiella aerogenes</i> , one <i>Klebsiella variicola</i> , one <i>Raoultella ornithinolytica</i> strain. 17 (10%) of 164 are CPE. 15 (88%) of the strains were MDR. 14 (82%) and 10 (59%) of the strains resistant to the 3rd and 4th generation cephalosporins cefotaxime and cefepime, respectively | Bleichenbacher (2020). Switzerland [22] |
| Locality: North Rhine-Westphalia, 16 sampling sites of bathing waters in the region. Source: Bathing waters                        | Period: May-Sep 2018.<br>Sampling: 750 ml of water<br>Number of samples: 64.<br>Number of isolates: not reported                                                        | <i>E. coli</i> , <i>Pseudomonas aeruginosa</i>          | 3 (4.68%) samples contained <i>E. coli</i> and <i>Pseudomonas aeruginosa</i> . <i>E. coli</i> - multidrug resistant. <i>Pseudomonas aeruginosa</i> - colistin-resistant                                                                                                                                                                                                                                           | Döhla (2020). Germany [23]              |
| Locality: lower Lahn River, two sites with different degrees of wastewater effluent impact. Source: Surface water                  | Period: Oct 2011-Dec 2012.<br>Sampling: Grab samples, 100 mL to 250 mL. Number of samples: 97. Number of isolates: not reported                                         | <i>E. coli</i> , blaCTX-M ARG                           | blaCTX-M genes encoding resistance to beta-lactam antibiotics: cephalosporins, carbapenems and penicillins in <i>Enterobacteriaceae</i> . blaCTX-M ARG were detected in all water samples                                                                                                                                                                                                                         | Herrig (2020). Germany [24]             |
| Locality: four rivers Danube, Glan, Inn, Traun. Source: Surface water, bathing water                                               | Period: 2016. Sampling: 100 ml, 20 to 30 cm below the river surface and 50 to 100 cm apart from the river bank. Number of samples: 12. Number of isolates: not reported | MRSA USA300                                             | 1 sample was identified as MRSA USA300 strain. Resistant to beta-lactams (benzylpenicillin, amoxicillin-clavulanic acid, cefoxitin), fluoroquinolones (ciprofloxacin, moxifloxacin) and erythromycin                                                                                                                                                                                                              | Lepuschitz (2018). Austria [25]         |
| Locality: The southern part, lakes. Source: Water                                                                                  | Period: 2002 - 2005. Sampling: Water samples. Number of samples: not reported. Number of isolates: not reported                                                         | qnrS                                                    | 1 isolate identified qnrS gene in <i>Aeromonas allosaccharophila</i> . Gene resistant to quinolones                                                                                                                                                                                                                                                                                                               | Picão (2008). Switzerland [26]          |
| Locality: Catchment of the river Swist; five sewage treatment plants located in the catchment area; sites with different levels of | Period: not reported. Sampling: 10 cm depth every 2 weeks over the period of a hydrological year. Number of samples: not reported. 614 isolates                         | <i>Rhodospirillaceae</i>                                | MDR occurred more often than resistance to a singled antibiotic. Highest MDR level was detected in the tributaries. 46% of MDR to 4 antibiotics in <i>Rhodopseudomonas palustris</i> isolates. Resistance to ofloxacin (22%), ceftazidime (22%) and piperacillin                                                                                                                                                  | Schreiber (2013). Germany [27]          |

|                                                                                                                                                          |                                                                                                                                                           |                                       |                                                                                                                                                                                                                                                                                                                                                                                                                                                                                                             |                                        |
|----------------------------------------------------------------------------------------------------------------------------------------------------------|-----------------------------------------------------------------------------------------------------------------------------------------------------------|---------------------------------------|-------------------------------------------------------------------------------------------------------------------------------------------------------------------------------------------------------------------------------------------------------------------------------------------------------------------------------------------------------------------------------------------------------------------------------------------------------------------------------------------------------------|----------------------------------------|
| human impact on the environment.<br>Source: wastewater samples; water samples from upstream and downstream from WWTP sites, water samples from tributary |                                                                                                                                                           |                                       | (28%), cephazoline (36%), oxacillin (41%). Resistance differed between the sampling sites                                                                                                                                                                                                                                                                                                                                                                                                                   |                                        |
| Locality: four sites along the River Weser: Bremen, Brake, Bremerhaven, Helgoland. Source: Surface water                                                 | Period: Jul-Sep 2018. Sampling: Surface water was collected with a bucket. Number of samples: 9. Number of isolates: not reported                         | <i>E. coli</i>                        | 64% resistant to fluoroquinolones, sulfamethoxazole/trimethoprim, aminoglycosides additionally to broad spectrum penicillins and cephalosporins. 31% MDR <i>E. coli</i> was isolated from the Helgoland site (highest MDR prevalence). 57% of MDR isolates were resistant to fluoroquinolone; 12% of MDR resistant to aminoglycosides and 19% to sulfamethoxazole/trimethoprim. 36 (36.3%) isolates - ESBL only; 32(32.3%) -resistant to fluoroquinolone only; 6 (6.1%) - resistant to aminoglycosides only | Song (2020). Germany [28]              |
| Locality: River Rhine. Source: Surface water                                                                                                             | Period: Jun 2006-Jun 2007. Sampling: Grab samples. Number of samples: 17. 100 isolates                                                                    | Coliform bacteria, <i>E. coli</i>     | Isolates of coliform bacteria: overall resistance (resistance to at least one antibiotic) was 54%. Of the resistant isolates, 41.3% was <i>E. coli</i> , 33.3% was <i>Klebsiella</i> , 16.7% could not be allocated to specific genera. Amoxicillin (48%), tetracycline (9%), sulfamethoxazole/trimethoprim (11%)                                                                                                                                                                                           | Stange (2016). Germany [29]            |
| Locality: South-western Germany, Gallusquelle. Source: Ground water, spring                                                                              | Period: March 2012 - June 2013. Sampling: Grab samples, 1.5-liter, 30 cm below the water surface. Number of samples: 76. Number of isolates: not reported | <i>E. coli</i> and <i>enterococci</i> | Of the samples: 39.5% sul2 genes, sul1 - 36.8%, dfrA1 - 30.3%, dfrA12 - 11.8%, tet (C) - 40.8%, tet(B) - 25.0%, tet(A) - 6.6%, tet(K) 5.3%; 42.1% were positive for ermB, aadA - 17.1%. 48.7% of sample have tetracyclines resistance genes (efflux genes), sulfonamide resistance genes were frequently detected; trimethoprim resistance genes in 41.8% of the samples; macrolide resistance genes in 42.1% of the samples; aminoglycoside resistance gene in 17.1% samples                               | Stange (2020). Germany [30]            |
| Locality: Rivers Rhine and Danube. Source: Surface water                                                                                                 | Period: not reported. Sampling: Duplicate grab samples, 500 mL each. Number of samples: 43.                                                               | Coliform bacteria, <i>E. coli</i>     | blaSHV 16%, ampC 19%, blaPSE-1 gene was not detected, tet(A) 7%, tet(B) 16%, tet (C) 22%, sul1 98%, sul2 77%, dfrA1 43%, dfrA13 gene was not detected, aac(3)-Iia 5%, cat1 5%, cat2 9%, floR 3%, ermB 68%,                                                                                                                                                                                                                                                                                                  | Stoll (2012). Germany (and Australia), |

|                                                                                                                                                                                                             |                                                                                                                                                                                                                               |                                                                                                                                                                                                                                                               |                                                                                                                                                                                                                                                                                                                                                                                                                                                                                                                                                                                                                                                                                                                                                                                                                     |                                     |
|-------------------------------------------------------------------------------------------------------------------------------------------------------------------------------------------------------------|-------------------------------------------------------------------------------------------------------------------------------------------------------------------------------------------------------------------------------|---------------------------------------------------------------------------------------------------------------------------------------------------------------------------------------------------------------------------------------------------------------|---------------------------------------------------------------------------------------------------------------------------------------------------------------------------------------------------------------------------------------------------------------------------------------------------------------------------------------------------------------------------------------------------------------------------------------------------------------------------------------------------------------------------------------------------------------------------------------------------------------------------------------------------------------------------------------------------------------------------------------------------------------------------------------------------------------------|-------------------------------------|
|                                                                                                                                                                                                             | Number of isolates: not reported                                                                                                                                                                                              |                                                                                                                                                                                                                                                               | ermA gene was not detected, vanB 2.3%. Of the samples, 100% sulfonamide resistance genes; 45% tetracycline resistance genes; 55% trimethoprim resistant; 16% beta-lactam resistance, 16% chloramphenicol resistance; 67% macrolide resistance genes; aminoglycoside and glycopeptide resistance genes in <10%                                                                                                                                                                                                                                                                                                                                                                                                                                                                                                       | only for Germany reported here [31] |
| Locality: Drinking water reservoir, 7 sites; is subject to the discharge of treated WW from two municipal STPs which do not treat WW from sources like hospitals or slaughterhouses. Source: Drinking water | Period: August 2018 - June 2019. Sampling: Grab samples; 250 mL. Number of samples: 48. 113 different isolates                                                                                                                | Clinically relevant ARB: <i>P. aeruginosa</i> , <i>E. coli</i> , A. calcoaceticus-baumannii (ACB) complex, <i>E. faecium</i> and other <i>Enterobacteriales</i> (including <i>Klebsiella</i> spp. <i>Citrobacter</i> spp. and <i>Enterobacter</i> spp.), MRSA | <i>Acinetobacter calcoaceticus-baumannii</i> complex 18.3%; 1 isolate MDR ACB complex; <i>E. coli</i> : 11 of 30 bacterial isolates were MDR; <i>Enterobacteriales</i> (predominately <i>Klebsiella</i> spp. and <i>Enterobacter</i> spp.) 12 of 24 isolates were MDR; <i>P. aeruginosa</i> no MDR; <i>E. faecium</i> : 10 out of 11 were MDR. ACB complex MDR resistance towards piperacillin/tazobactam (P/T), cefotaxime (CEFO), ceftazidime (CEFTA) and trimethoprim-sulfamethoxazole (T/S); <i>E. coli</i> resistant to CEFO, CEFTA, ciprofloxacin, and T/S; All <i>Klebsiella</i> isolates were resistant for CEFO and CIP. <i>Enterobacter</i> spp. resistance pattern varied widely including the substances P/T, CEFO, CEFTA, CIP, CHL, T/S and fosfomycin. Prevalence not reported. MRSA was not detected | Voigt (2020). Germany [32]          |
| Locality: North-western, Lützel stream, downstream from WWTP. Source: Spring water, surface water                                                                                                           | Period: March-Sep 2009. Sampling: 1,000, 100, and 10 ml for spring water and 100, 10, and 1 ml for surface water; 15 to 20 cm depth. Number of samples: Spring water: 22; Surface water: 16. Number of isolates: not reported | <i>E. coli</i>                                                                                                                                                                                                                                                | Multidrug resistant <i>E. coli</i> were detected in all surface water samples and in 14 (63.6%) spring water samples.                                                                                                                                                                                                                                                                                                                                                                                                                                                                                                                                                                                                                                                                                               | Wicki (2011). Switzerland [33]      |
| Locality: The River Mur (Graz); one sampling site; upstream of the urban WWTP. Source: Surface water                                                                                                        | Period: Oct 2015-Jan 2016. Sampling: Iterative sampling; 500 ml; 30 cm below the river surface, 50 cm apart from the river bank. Number of samples: 4 samples. 109 isolates                                                   | ESBL- and carbapenemases harboring <i>Enterobacteriaceae</i>                                                                                                                                                                                                  | <i>Enterobacteriaceae</i> : <i>E. coli</i> and <i>Klebsiella oxytoca</i> ; 71 isolates (65.1%) were identified as ESBL-positive; 2 isolates (1.8%) were tested positive for carbapenemases. <i>K. oxytoca</i> revealed resistance to piperacillin, amoxicillin/clavulanic acid, cephalixin, cefuroxime, ceftazidime and nalidixic acid.                                                                                                                                                                                                                                                                                                                                                                                                                                                                             | Zarfel (2017). Austria [34]         |

|  |  |  |                                                                                                                                                                                                                                                                                                             |  |
|--|--|--|-------------------------------------------------------------------------------------------------------------------------------------------------------------------------------------------------------------------------------------------------------------------------------------------------------------|--|
|  |  |  | 70 <i>E. coli</i> ESBL isolates were resistant to ampicillin, piperacillin and cefuroxime. 50% <i>E. coli</i> ESBL were non-beta-lactame antibiotic and trimethoprim co-resistant; nalidixic acid 35.71%, tetracycline 44.29%, trimethoprim/sulfamethoxazole 44.29%; 10.00% resistance to fluoroquinolones. |  |
|--|--|--|-------------------------------------------------------------------------------------------------------------------------------------------------------------------------------------------------------------------------------------------------------------------------------------------------------------|--|

Table S4. Presence of antibiotic resistance or antibiotic resistance genes in wastewater as reported in the included studies (n = 13)

| Source                                                                                                                                                 | Samples                                                                                                                                                                                                                                                                                                     | Target                                                                                                                                                                                | Reported ARB, ARGs presence                                                                                                                                                                                                                                                                                                                                                                                                                                                                                                                                                                                                                                                                                                                                                                     | Refs                                                                |
|--------------------------------------------------------------------------------------------------------------------------------------------------------|-------------------------------------------------------------------------------------------------------------------------------------------------------------------------------------------------------------------------------------------------------------------------------------------------------------|---------------------------------------------------------------------------------------------------------------------------------------------------------------------------------------|-------------------------------------------------------------------------------------------------------------------------------------------------------------------------------------------------------------------------------------------------------------------------------------------------------------------------------------------------------------------------------------------------------------------------------------------------------------------------------------------------------------------------------------------------------------------------------------------------------------------------------------------------------------------------------------------------------------------------------------------------------------------------------------------------|---------------------------------------------------------------------|
| Locality: not reported.<br>Source: WWTP (activated sludge system (AS))                                                                                 | Period: not reported. Sampling: Samples from the influent and effluent; 3 grab samples each; 5L. Number of samples: 6. Number of isolates: not reported                                                                                                                                                     | ARGs: Targeted metagenomic analysis                                                                                                                                                   | Pathogens (ARB not reported): Proteobacteria in the AS influent (40%) and effluent (26%). Firmicutes (30%) > Bacteroidetes (12%)> Actinobacteria (8%) in the AS influent; and Actinobacteria (8%)> Patescibacteria (23%)> Bacteroidetes (9%)> Firmicutes (5%) in the AS effluent.<br>MDR ARG: AS effluent (35%) and AS influent (50%). ARG for MLS (mefA, mel, ErmB, and mphD) and tetracycline (tetW and tetQ) were dominant in the influent but decreased in the effluent. ARG for aminoglycoside resistance (APH(6)-Id and aadA5), tetracycline (tet44), rifamycin (rpoB), macrolide (mtrA, EreA2), quinolone (QnrS6) were dominant in the AS effluent. ARG types encoding resistance (from influent to (->) effluent): aminocoumarin (2->5%), cephalosporin (0->2%), and rifamycin (17->1%) | Agrawal (2020). Germany and Namibia, here reported for Germany [35] |
| Locality: not reported.<br>Source: Hospital wastewater, municipal WWTP (influent, effluent), river surface water, rain overflow basins, groundwater    | Period: 2 years, not reported. Sampling: 16 sampling sites; clinical wastewater, in- and effluents of WWTP - 24-hour composite samples. Number of samples: 20: 2 - hospital wastewater, 8 - from 4 municipal WWTPs (influent, effluent), 3 - river surface water, 4 - rain overflow basins, 3 - groundwater | <i>Enterococcus faecium/faecalis</i> , <i>Pseudomonas aeruginosa</i> , <i>Enterobacteriaceae</i> , <i>Staphylococcus aureus</i> , and CNS. ARGs: blaVIM-1, vanA, ampC, ermB, and mecA | <i>Enterococci</i> , <i>Staphylococci</i> /CNS, <i>P. aeruginosa</i> , <i>Enterobacteriaceae</i> and ARGs blaVIM-1, vanA, ampC, ermB were determined in all samples. Only concentrations are reported.                                                                                                                                                                                                                                                                                                                                                                                                                                                                                                                                                                                          | Alexander (2015). Germany [72]                                      |
| Locality: not reported.<br>Source: 23 conventionally treated WWTP effluents; 3 clusters of catchment areas: communal (n=11), food production/slaughter | Period: Feb-Nov 2018. Sampling: 4 sampling campaigns; grab samples. Number of samples: 92. Number of isolates: not reported                                                                                                                                                                                 | Taxonomic gene markers and ARGs. Studied ARGs: sul1, ermB, blaTEM, tetM, blaCTX-M-15,                                                                                                 | 99.8–99.9% of the total ARG consisted of ARGs against macrolides (ermB), tetracycline (tetM), Beta-lactame (blaTEM), and sulfonamide (sul1). 0.03–0.17% of the total ARG: beta-lactame ARGs: blaCMY2, blaCTX-M15, blaCTX-M32, and the carbapeneme resistance gene blaOXA48. 0.0001–0.00016% of the total ARG: carbapeneme resistance blaNDM-1, vancomycin                                                                                                                                                                                                                                                                                                                                                                                                                                       | Alexander (2020). Germany [36]                                      |

|                                                                                                                                                                                                       |                                                                                                                                                                                                                                                                                                                                                                                                                                                                                                     |                                                                                                                               |                                                                                                                                                                                                                                                                                                                                                                                                                                                              |                                                                               |
|-------------------------------------------------------------------------------------------------------------------------------------------------------------------------------------------------------|-----------------------------------------------------------------------------------------------------------------------------------------------------------------------------------------------------------------------------------------------------------------------------------------------------------------------------------------------------------------------------------------------------------------------------------------------------------------------------------------------------|-------------------------------------------------------------------------------------------------------------------------------|--------------------------------------------------------------------------------------------------------------------------------------------------------------------------------------------------------------------------------------------------------------------------------------------------------------------------------------------------------------------------------------------------------------------------------------------------------------|-------------------------------------------------------------------------------|
| house wastewater (n=4),<br>hospital (n=8)                                                                                                                                                             |                                                                                                                                                                                                                                                                                                                                                                                                                                                                                                     | blaCTX-M-32,<br>blaOXA-48, mecA,<br>vanA, mcr-1,<br>blaNDM-1                                                                  | resistance vanA, methicilin resistance mecA, colistin<br>resistance mcr-1                                                                                                                                                                                                                                                                                                                                                                                    |                                                                               |
| Locality: the Danube<br>River Basin. Germany:<br>Augsburg. Austria:<br>Amstetten.<br>Source: WWTP on the<br>Danube River Basin,<br>mainly industrial<br>wastewater                                    | Period: Aug, Sep 2017. Sampling:<br>WWTP composite effluent<br>samples, 7 liters (1 L for every<br>day for a week), 0.5 L used for<br>analysis of ARGs. Number of<br>samples: 12. Number of isolates:<br>not reported                                                                                                                                                                                                                                                                               | Quantified ARGs:<br>aph(III)a, blaKPC,<br>blaOXA, blaSHV,<br>ermB, ermF, mecA,<br>qnrS, sul1, tetB,<br>tetM, vanA and<br>vanB | Detected ARGs in Austria and Germany: int1, sul1,<br>ermB, tetM, ermF, blaOXA, aph(III)a (descending order<br>of concentration). Comparing to other countries, the<br>minimum number of detected ARGs was observed at<br>the WWTPs Amstetten and Augsburg (7 ARGs).                                                                                                                                                                                          | Alygizakis<br>(2019). 9<br>countries<br>including<br>Germany,<br>Austria [37] |
| Locality: a nursing home<br>located in south-west<br>Germany. Source: Sewage<br>samples, water samples<br>upstream from municipal<br>sewage from the village<br>and downstream of the<br>nursing home | Period: Nov 2012-Mar 2013.<br>Sampling: Up- and downstream<br>sewage water samples; samples<br>every two hours over a 24-h<br>period, combined as "24-h<br>composite samples". Number of<br>samples: 4                                                                                                                                                                                                                                                                                              | ARGs:<br>metagenomic<br>approach                                                                                              | Detected ARGs: rpoB, tetW, gyrA, aminoglycoside<br>adenyltransferases, macrolide resistance genes ermB<br>and macB, the multidrug gene acrB (resistance-<br>modulation-division family), quinolone resistance<br>genes parC and both tetracycline genes tetO and tet32.<br>Lower abundance: sulfonamide resistance genes such<br>as folP, sul1, sul2 and vancomycin resistance related<br>genes such as vanC, vanR, vanS, vanT, vanWvanXYC,<br>vanY and vanZ | Bäumlisberge<br>r (2015).<br>Germany [38]                                     |
| Locality: multiple. Source:<br>wastewater: a hospital-<br>associated wastewater<br>treatment plant in Basel;<br>rural and urban surface<br>water                                                      | Period: 2012-2019. Sampling:<br>Wastewater samples collected<br>over 1 year at different influent<br>and effluent sampling sites;<br>screening surface water samples<br>from geographically distributed<br>rivers in Switzerland for<br>fosfomycin-resistant<br><i>Enterobacteriaceae</i> ; 100mL water<br>samples. Number of samples: 58<br>rural and urban water, 128<br>surface water samples from<br>screening; number of wastewater<br>samples is not given. Number of<br>isolates is reported | <i>E. coli</i> and <i>Klebsiella</i><br>spp, fosA-carrying<br>plasmids                                                        | Urban/ rural water: 74 isolates ESBL-producing<br><i>Enterobacteriaceae</i> of them 1 fosfomycin-resistant<br>isolate. Wastewater: 59 carbapenem-or amikacin-<br>resistant <i>Enterobacteriaceae</i> isolates, of them 6<br>fosfomycin-resistant isolates. 3 isolates from the<br>screening.                                                                                                                                                                 | Biggel (2021).<br>Switzerland<br>[39]                                         |

|                                                                                                                                                              |                                                                                                                                                                           |                                                                                                                                                                                                               |                                                                                                                                                                                                                                                                                                                                                                                                                                                                                                                                                                                                                                                                                                                                                                                                                                                                                                                                                                                                                                                                                                      |                              |
|--------------------------------------------------------------------------------------------------------------------------------------------------------------|---------------------------------------------------------------------------------------------------------------------------------------------------------------------------|---------------------------------------------------------------------------------------------------------------------------------------------------------------------------------------------------------------|------------------------------------------------------------------------------------------------------------------------------------------------------------------------------------------------------------------------------------------------------------------------------------------------------------------------------------------------------------------------------------------------------------------------------------------------------------------------------------------------------------------------------------------------------------------------------------------------------------------------------------------------------------------------------------------------------------------------------------------------------------------------------------------------------------------------------------------------------------------------------------------------------------------------------------------------------------------------------------------------------------------------------------------------------------------------------------------------------|------------------------------|
| Locality: Area of Graz, Styria. Source: The basin of the incoming untreated wastewater at a sewage treatment plant                                           | Period: Sep 2011-Feb 2012. Sampling: Twice a month; sludge samples were collected using sterile wide-mouth bottles. Number of samples: 11. Number of isolates is reported | ESBL-harbouring <i>Enterobacteriaceae</i> . Screening for: blaCTX-M-1group, blaCTX-M-2group, blaCTX-M-9 group, blaGES, blaSHV, blaTEM, and blaVEB<br><br>MRSA, Vancomycin-resistant <i>Enterococcus</i> (VRE) | 10 (82%) of 11 samples were positive for ESBL-harbouring <i>Enterobacteriaceae</i> , 3 (27%) samples were positive for MRSA and 4 (36%) samples for VRE. 117 <i>Enterobacteriaceae</i> isolates, of them MDR: 21 <i>E. coli</i> , 7 <i>Klebsiella pneumoniae</i> , 3 <i>Enterobacter</i> spp. and 1 <i>Raoultella ornithinolytica</i> . 32 isolates with ESBL genes: 28.6% blaCTX-M-15, 14.3% blaCTX-M-1, 11.9% blaCTX-M-14, 7.1% blaCTX-M-3, 2.4% blaCTX-M-38. Co-resistance: quinolones, nalidixic acid 75% (24 of 32), ciprofloxacin 56.3% (18 of 32) and moxifloxacin 53.1% (17 of 32). Co-resistance for tetracycline was 53.1% (17 of 32) and for trimethoprim/sulfamethoxazole 50% (16 of 32). Co-resistance rates to aminoglycoside compounds were low with 34.4% (11 of 32) for gentamicin and 0% for amikacin. VRE: <i>Enterococcus faecium</i> , harboured the vanA gene. VRE resistant to ampicillin, teicoplanin, and vancomycin. MRSA: one t032, with resistance to erythromycin, norfloxacin and gentamycin and one t067 with resistance to erythromycin, clindamycin and norfloxacin | Galler (2018). Austria [40]  |
| Locality: not reported. Source: 7 WWTPs with different population equivalents and catchment areas                                                            | Period: not reported. Sampling: 24 h-composite influent samples 100mL; WWTP effluent 300 mL. Number of samples: not reported. Number of isolates: not reported            | Screening for mcr-1 colistin resistance gene                                                                                                                                                                  | The presence of the colistin resistance gene was documented for all of the influent wastewater samples of the seven WWTPs. The mcr-1 resistance gene was also detected in effluent samples of the WWTPs after conventional treatment. Other 6 quantified ARGs: ermB, tetM, CTX-M-32, blaTEM, CMY-2, and CTX-M                                                                                                                                                                                                                                                                                                                                                                                                                                                                                                                                                                                                                                                                                                                                                                                        | Hembach (2017). Germany [41] |
| Locality: East Westphalia-Lippe. Source: 4 stages of meat production: slaughterhouses, meat-processing plants, fresh food products and the urban environment | Period: 2018 - 2019. Sampling: From the EU-wide zoonoses-monitoring program. Number of samples: Water: 37, Sewage/Sludge/Soil: 17. Number of isolates is reported         | Screened for ESBL-producing, carbapenemase-producing <i>Enterobacterales</i> and colistin-resistant <i>Enterobacterales</i>                                                                                   | Water: 0 isolates. Sewage/Sludge/Soil: 4 VRE isolates, 8 ESBL-producing <i>E. coli</i> isolates. Antimicrobial resistance genes: 28% in CPE bacteria, 9% in Col-E, 7% in VRE, 15% in ESBL                                                                                                                                                                                                                                                                                                                                                                                                                                                                                                                                                                                                                                                                                                                                                                                                                                                                                                            | Klees (2020). Germany [73]   |
| Locality: Clinical/urban wastewater: North-Rhine                                                                                                             | Period: Sep 2016-Jul 2017. Sampling: From sewer and                                                                                                                       | MDR and XDR bacteria                                                                                                                                                                                          | 1043 strains: 568 in the rural system (388 of these isolates wastewater or treated wastewater) 475 in the                                                                                                                                                                                                                                                                                                                                                                                                                                                                                                                                                                                                                                                                                                                                                                                                                                                                                                                                                                                            | Müller (2018). Germany [42]  |

|                                                                                                                                                                                                                                                                                           |                                                                                                                                                                                                                                                                                                                                      |                                                                                                                                |                                                                                                                                                                                                                                                                                                                                                                                                                                                                                                                                                                                                                                 |                                  |
|-------------------------------------------------------------------------------------------------------------------------------------------------------------------------------------------------------------------------------------------------------------------------------------------|--------------------------------------------------------------------------------------------------------------------------------------------------------------------------------------------------------------------------------------------------------------------------------------------------------------------------------------|--------------------------------------------------------------------------------------------------------------------------------|---------------------------------------------------------------------------------------------------------------------------------------------------------------------------------------------------------------------------------------------------------------------------------------------------------------------------------------------------------------------------------------------------------------------------------------------------------------------------------------------------------------------------------------------------------------------------------------------------------------------------------|----------------------------------|
| Westphalia. Water from rural area: small river in western part of Germany. Source: Wastewater discharge from hospital buildings; inflow to the receiving municipal sewage treatment plant; WWTP effluent; receiving river upstream and downstream of the WWTP discharge; rural wastewater | WWTP every 6 weeks as automated 24 h mixed samples. Number of samples: 16. Number of isolates: 1043                                                                                                                                                                                                                                  | ACB complex, <i>E. coli</i> , <i>K. pneumoniae/oxytoca</i> , the <i>Enterobacter cloacae</i> complex, and <i>P. aeruginosa</i> | clinical/urban system (456 of the isolates were obtained from wastewater or treated wastewater). Clinical/urban: 99.58% cefotaxim/ceftazidim resistant, 25.05% 3MRGN, 28.42% 4MRGN; 9.68% 4MRGN, colistin, positive carbapenemase; 5.47% XDR. Rural: 98.94% cefotaxim/ceftazidim resistant, 15.49% 3MRGN, 0.70% 4MRGN; 0.18% 4MRGN, colistin, positive carbapenemase; 0.00% XDR                                                                                                                                                                                                                                                 |                                  |
| Locality: southern Austria. Source: Sewage, sludge and receiving waters from 3 different sewage treatment plants                                                                                                                                                                          | Period: Apr-Sep 2000. Sampling: 500 ml sewage, 5 sampling days, sites: inflow (crude sewage), activated sludge tank, effluent, receiving water before outlet (upstream), receiving water after outlet (downstream); 50 g sludge after sewage-sludge press. Number of samples: 5 from each WWTP and site. 767 <i>E. coli</i> isolates | <i>E. coli</i>                                                                                                                 | 767 <i>E. coli</i> isolates: 307 (40%) were resistant against one or several of the 24 antibiotics tested; 244 (31.8%) showed an acquired resistance; out of these 244 isolates, 170 (69.7%) showed a single resistance phenotype, 50 (20.5%) double resistance and 24 (9.8%) - MDR. Penicillin group: highest resistance rates against ampicillin (up to 18%) and piperacillin (up to 12%); in the cephalosporin group: for cefalothin (up to 35%) and cefuroxime-axetil (up to 11%); in the group of quinolones: for nalidixic acid (up to 15%); and for trimethoprim/sulfamethoxazole (up to 13%) and for tetracycline (57%) | Reinthalder (2003). Austria [43] |
| Locality: district of Kleve. Source: Wastewater, sewage sludge and effluent water; secondary WWTP                                                                                                                                                                                         | Period: May 2018-Apr 2019. Sampling: each week. Number of samples: 36. Number of isolates is not reported                                                                                                                                                                                                                            | bla and mcr genes in the isolates                                                                                              | 244 bla genes of types: blaOXA-58, blaOXA-23, blaOXA-48, blaGES, blaVIM, blaCTX-M-1, blaCTX-M-9, blaCMY-2, blaFOX, blaACT-MIR and blaDHA found in all samples. mcr-1 was detected only in 8 (9%) wastewater samples                                                                                                                                                                                                                                                                                                                                                                                                             | Schages (2020). Germany [44]     |
| Locality: the Ruhr Metropolis. Source: community wastewater, no in-patient health care facility in the catchment area; 3 sampling stations in socio-spatially different                                                                                                                   | Period: Apr 2019-Mar 2020. Sampling: once per month from 3 sampling points and one sampling point at the WWTP. Number of samples: 48. 112 <i>E. coli</i> isolates                                                                                                                                                                    | <i>E. coli</i> and ESBL-producing <i>E. coli</i>                                                                               | Phenotypic ESBL-producing <i>E. coli</i> were isolated from every sampling point in every month. 112 <i>E. coli</i> isolates: no resistance to amikacin, tigecycline or fosfomycin, neither to imipenem or meropenem. 3MRGN resistant to piperacillin, cefotaxime and ciprofloxacin: 19.2% - 31.0% in the areas and 37.0% in WWTP. High prevalence of resistance for piperacillin                                                                                                                                                                                                                                               | Schmiege (2021). Germany [45]    |

|                                                     |  |  |                                                                                                                                                                                                                                                                            |  |
|-----------------------------------------------------|--|--|----------------------------------------------------------------------------------------------------------------------------------------------------------------------------------------------------------------------------------------------------------------------------|--|
| districts; the influent of the local municipal WWTP |  |  | (112/112) and cefotaxime (111/112). Ceftazidime: 34.6% - 58.6% in the areas and 55.6% in WWTP; ciprofloxacin: 19.2% - 31.0% and 35.8%; chloramphenicol: 13.8% - 15.4% in areas and 11.8 in WWTP; trimethoprim-sulfamethoxazole: 50.0% - 60% in the areas and 33.3% in WWTP |  |
|-----------------------------------------------------|--|--|----------------------------------------------------------------------------------------------------------------------------------------------------------------------------------------------------------------------------------------------------------------------------|--|

Table S5. Presence of antibiotic resistance or antibiotic resistance genes in the environment of animal husbandry as reported in the included studies (n = 8)

| Source                                                                                                                                                  | Samples                                                                                                                                                                                                                                                                                                                                                                                                      | Target                                                                    | Reported ARB, ARGs presence                                                                                                                                                                                                                                                                             | Refs                                |
|---------------------------------------------------------------------------------------------------------------------------------------------------------|--------------------------------------------------------------------------------------------------------------------------------------------------------------------------------------------------------------------------------------------------------------------------------------------------------------------------------------------------------------------------------------------------------------|---------------------------------------------------------------------------|---------------------------------------------------------------------------------------------------------------------------------------------------------------------------------------------------------------------------------------------------------------------------------------------------------|-------------------------------------|
| Locality: Nationwide.<br>Source: Piggery manure;<br>manure storage tanks of<br>15 farms                                                                 | Period: May - June 2006.<br>Sampling: Manure from storage<br>tanks collected for c. 6 months.<br>Number of samples: 16. Number<br>of isolates: not reported                                                                                                                                                                                                                                                  | Plasmids resistant<br>to amoxicillin,<br>sulfadiazine and<br>tetracycline | Among the 81 plasmids, 44 carried the bla-TEM gene,<br>23 carried sul1, 46 sul2 and 6 sul3. Many plasmids<br>carried bla-TEM and one or two genes coding for<br>sulfadiazine resistance (sul1, sul2 or sul3). 7 plasmids<br>with the sulfadiazine resistance phenotype carried 2<br>different sul genes | Binh (2008).<br>Germany [46]        |
| Locality: not reported.<br>Source: environmental<br>swabs, manure, flies, mice<br>faeces, farmers dogfaeces,<br>air samples collected with<br>impingers | Period: 2011-2012. Sampling:<br>Retrospective analysis of samples<br>collected in longitudinal studies<br>within the German national<br>ESBL-surveillance project RESET.<br>Number of samples:<br>Environmental swabs (n = 12),<br>manure (n = 9), flies (n = 4), mice<br>faeces (n = 3), farmers dogs faeces<br>(n = 3), air samples collected with<br>impingers (n = 2). Number of<br>isolates is reported | VIM-1-positive <i>E.<br/>coli</i> and <i>Salmonella</i>                   | 40 blaVIM-1-positive isolates total. 22 <i>E. coli</i> isolates in<br>single faeces, manure, flies.                                                                                                                                                                                                     | Fischer (2017).<br>Germany [47]     |
| Locality: not reported.<br>Source: Boot swabs, flies,<br>dog faeces and manure                                                                          | Period: 2011 - 2012. Sampling:<br>Samples collected within the<br>German national ESBL-<br>surveillance project RESET. 7 pig<br>farms. Number of samples: Boot<br>swabs (25), barn flies (n = 3), a<br>barn dog (n= 1), manure (n = 5)<br>and mice faeces (n = 1). Number<br>of screened isolates is not<br>reported                                                                                         | mcr-1-positive <i>E.<br/>coli</i>                                         | 7 mcr-1-positive <i>E. coli</i> strains originating from boot<br>swabs and emission sources such as dog faeces, stable<br>flies and manure.                                                                                                                                                             | Guenther<br>(2017).<br>Germany [48] |
| Locality: Bavaria. Source:<br>Manure samples                                                                                                            | Period: Autumn 2002 - Spring<br>2003. Sampling: at the time of<br>manure application to soil. One<br>manure sample per farm.                                                                                                                                                                                                                                                                                 | <i>Salmonella spp</i>                                                     | 7 samples (1.6%) contained <i>Salmonella</i> . 5 out of 7<br>manure samples (72%) contained antibiotic resistant<br>isolates, all of them were MDR.                                                                                                                                                     | Hölzel (2008).<br>Germany [49]      |

|                                                                                                                  |                                                                                                                                                                                                                                                                                                                                                     |                                                                                                                                                                                                     |                                                                                                                                                                                                                                                                                                                                                                                                                                                                                                                                                                                                                                                                                                                                                                                                                                                                                          |                                   |
|------------------------------------------------------------------------------------------------------------------|-----------------------------------------------------------------------------------------------------------------------------------------------------------------------------------------------------------------------------------------------------------------------------------------------------------------------------------------------------|-----------------------------------------------------------------------------------------------------------------------------------------------------------------------------------------------------|------------------------------------------------------------------------------------------------------------------------------------------------------------------------------------------------------------------------------------------------------------------------------------------------------------------------------------------------------------------------------------------------------------------------------------------------------------------------------------------------------------------------------------------------------------------------------------------------------------------------------------------------------------------------------------------------------------------------------------------------------------------------------------------------------------------------------------------------------------------------------------------|-----------------------------------|
|                                                                                                                  | Number of samples: 380. Number of isolates: not reported                                                                                                                                                                                                                                                                                            |                                                                                                                                                                                                     |                                                                                                                                                                                                                                                                                                                                                                                                                                                                                                                                                                                                                                                                                                                                                                                                                                                                                          |                                   |
| Locality: not reported. Source: Process water from delivery and unclean areas, wastewater from the in-house WWTP | Period: December 2016 - September 2018. Sampling: Water: 1 Liter; 2 slaughterhouses. 7 sites: water from cleaning transport trucks, transport crates, stunning facilities, scalding water, eviscerators, production facilities, and the influent and effluent. Number of samples: Process water: 50; wastewater: 32. Number of isolates is reported | <i>Enterococcus spp.</i> , <i>Staphylococcus aureus</i> , <i>Klebsiella pneumoniae</i> , <i>Acinetobacter baumannii</i> , <i>Pseudomonas aeruginosa</i> , <i>Enterobacter spp.</i> , <i>E. coli</i> | At least one of the target species was detected in 87.5% of the wastewater samples and 86.0% of the process water samples. Isolates (94.9%, n = 448/472): <i>E. coli</i> (39.4%), the <i>A. calcoaceticus</i> - <i>A. baumannii</i> (ACB) complex (32.4%), <i>S. aureus</i> (12.3%), and <i>K. pneumoniae</i> (10.8%). 58 MRSA isolates. 15-19 <i>E. coli</i> isolates harboring blaCTX-M genes and expressing the 3MDR. Among 93 <i>E. coli</i> isolates >90% resistance to piperacillin, cefotaxime, ceftazidime; the most common gene was blaTEM, followed by blaCTX-M and blaSHV. 77 ACB complex from each house: 100% resistance to temocillin, fosfomycin and cefotaxime                                                                                                                                                                                                           | Savin (2020). Germany [50]        |
| Locality: North Rhine-Westphalia, Lower Saxony. Source: Dust and manure samples                                  | Period: February 2013 - September 2013. Sampling: 41 pig farms. Number of samples: Samples used for ESBL-producing enterobacteria detection (number not reported) and 6 additional dust and manure samples. 344 CoNS isolates                                                                                                                       | CoNS, MSSA, MRSA                                                                                                                                                                                    | <i>S. sciuri</i> (158/344, 46%), <i>S. simulans</i> (50/344, 14%), <i>S. chromogenes</i> (34/344, 9.9%), <i>S. pasteurii</i> (26/344, 7.6%) and <i>S. haemolyticus</i> (21/344, 6.1%). <i>S. sciuri</i> was detectable in dust and liquid manure in the majority of the farms (34 of 41; 83%). 65% (184) of the CoNS were resistant to benzylpenicillin and 64% (222) to oxacillin, 38% (130/344) - to erythromycin and 54% (187/344) to clindamycin, 71% (243/344) - to tetracycline, 17% (59/344) - spectinomycin, 8.7% (30/344) chloramphenicol- and 5.5% (19/344) florfenicol-resistant; 20% (70/344) - trimethoprim/sulfamethoxazole, 3.5% - rifampicin (12/344), 19% (66/344) - fosfomycin. <i>S. sciuri</i> isolates: 74% (97/131) were resistant to benzylpenicillin, 87% (137/158) - tetracycline, 99% to oxacillin resistant (156/158), of them 67% harboured the mecASCC gene | Schoenfelder (2017). Germany [51] |
| Locality: Bavaria. Source: Liquid manure samples from pig farms                                                  | Period: Autumn 2002 - spring 2003. Sampling: Samples originate from representative monitoring; one sample per farm; at the time of manure application to the fields. Number of samples and isolates: 179.                                                                                                                                           | <i>Enterococcus</i> , tetracycline ARGs                                                                                                                                                             | Doxycycline resistant <i>E. faecalis</i> (n = 147) and phenotypically doxycycline susceptible <i>E. faecalis</i> (n = 32). Of 147 doxycycline resistant <i>E. faecalis</i> , 127 (86%) carried the tet(M) gene, 94 strains (64%) tet(L), 11 strains (7%) tet(S), and 7 strains (5%) tet(O).                                                                                                                                                                                                                                                                                                                                                                                                                                                                                                                                                                                              | Schwaiger (2009). Germany [52]    |

|                                                                                                                                         |                                                                                                                                                                                                                             |                                                       |                                                                                                                            |                                          |
|-----------------------------------------------------------------------------------------------------------------------------------------|-----------------------------------------------------------------------------------------------------------------------------------------------------------------------------------------------------------------------------|-------------------------------------------------------|----------------------------------------------------------------------------------------------------------------------------|------------------------------------------|
| <p>Locality: Lower Saxony.<br/> Source: Pig manures, 8 pig fattening and 6 pig breeding farms.<br/> Digestates from 8 biogas plants</p> | <p>Period: Autumn 2012. Sampling: Samples from cellars, silos, or lagoons using a probe sampler, a bypass sampler or in backflush mode from the vacuum tanker. 4 samples from each farm, 8L.<br/> Number of samples: 56</p> | <p>ARGs: sul1, sul2, sul3, tet(A), tet(M), tet(X)</p> | <p>ARGs sul1, sul2, tet(A), tet(M), tet(X), qacEdelta1 were detected in the samples. The occurrence is not quantified.</p> | <p>Wolters (2016).<br/> Germany [53]</p> |
|-----------------------------------------------------------------------------------------------------------------------------------------|-----------------------------------------------------------------------------------------------------------------------------------------------------------------------------------------------------------------------------|-------------------------------------------------------|----------------------------------------------------------------------------------------------------------------------------|------------------------------------------|

Table S6. Presence of antibiotic resistance or antibiotic resistance genes in wildlife as reported in the included studies (n = 8)

| Source                                                                                                                                                                                                 | Samples                                                                                                                                                                                                                                                                                                                                                                                                                                                                                                                                                                              | Target                                                                                                                                                                                                    | Reported ARB, ARGs presence                                                                                                                                                                                                                                                                                                                                                                                                                                                                                                                                                                                                      | Refs                                   |
|--------------------------------------------------------------------------------------------------------------------------------------------------------------------------------------------------------|--------------------------------------------------------------------------------------------------------------------------------------------------------------------------------------------------------------------------------------------------------------------------------------------------------------------------------------------------------------------------------------------------------------------------------------------------------------------------------------------------------------------------------------------------------------------------------------|-----------------------------------------------------------------------------------------------------------------------------------------------------------------------------------------------------------|----------------------------------------------------------------------------------------------------------------------------------------------------------------------------------------------------------------------------------------------------------------------------------------------------------------------------------------------------------------------------------------------------------------------------------------------------------------------------------------------------------------------------------------------------------------------------------------------------------------------------------|----------------------------------------|
| Locality: Bavaria, Mecklenburg-Pomerania, Saxony-Anhalt, Saxony and Brandenburg. Source: Wild rodents, faecal samples, rural areas                                                                     | Period: 2007 - 2008. Sampling: Samples from 8 rodent and 1 shrew species. Sampling sites: agriculturally and silviculturally used farmland and natural preserve areas. Different sampling schemes including rodent monitoring programmes in woodland in Bavaria, Mecklenburg-Pomerania, Saxony-Anhalt, Saxony and Brandenburg and longitudinal studies in Hanta and Dobrava-Belgrad virus endemic areas of the network "Rodent-borne pathogens". Number of samples: 1443. Animals were sampled once, and one colony per sample was further processed. Number of isolates is reported | Targeted ARB: <i>E. coli</i> ; ARGs: tetracycline (tet(A), tet(B) and tet(C)), sulfonamides (sul1, sul2 and sul3), streptomycin-spectinomycin (aadA, strA and strB), and apramycin-gentamicin (aac(3)-IV) | 188 faecal isolates (from 188 samples). 5.5% of the isolates exhibit resistant phenotypes against at least one antimicrobial compound including beta-lactams, tetracyclines, aminoglycosides and sulfonamides. 10 phenotypic resistance isolates were preselected. <i>E. coli</i> preselected isolates: 2% of all isolates were resistant against ampicillin, 3% against ticarcillin, 4% against streptomycin, 3% against spectinomycin, 0.5% against sulfamethoxazole/trimethoprim, 0.5% against kanamycin and 1.5% against tetracycline. Resistances to cephalosporins, chloramphenicol and fluoroquinolones were not observed | Guenther (2010). Germany [54]          |
| Locality: Öttingen, Kössingen (Germany); Vienna, Miesenbach, Rohr-Gebirge, Orth an der Donau, Schützen, Klein-Rust, Eggenburg, Zell-See (Austria). Source: Mouflons ( <i>Ovis orientalis musimon</i> ) | Period: Mar 2012-Jan 2016. Sampling: Nasal and perineal swabs and/or organ samples from free-living 32 mouflons. Hunted game animal species. Dead mouflons submitted explicitly for diagnostic pathological examinations in order to determine their respective cause of death. Sent to Research Institute of Wildlife Ecology for postmortem analysis. Number of samples: 32. Number of isolates is reported                                                                                                                                                                        | Selection of broad-spectrum cephalosporin-resistant <i>Enterobacteriaceae</i> and enterobacterial isolates with reduced susceptibility to fluoroquinolones                                                | 1 <i>E. coli</i> ESBL phenotype isolate was resistant to all antimicrobial agents tested except imipenem and colistin: ampicillin, amoxicillin/clavulanic acid, ceftiofur, cefquinome, cephalotin, cefotaxime, cefoperazone, nalidixic acid, streptomycin, neomycin, gentamicin, ciprofloxacin, enrofloxacin, trimethoprim-sulfamethoxazole, tetracycline, doxycycline, chloramphenicol, florfenicol.                                                                                                                                                                                                                            | Loncaric (2016). Austria, Germany [55] |
| Locality: Migratory population in the Lobau. Non-migratory                                                                                                                                             | Period: Mar 2013. Sampling: Fresh faeces. Number of samples: 54 from migratory and 102 from a resident                                                                                                                                                                                                                                                                                                                                                                                                                                                                               | beta-lactamase producing <i>Enterobacteriaceae</i> and methicillin-                                                                                                                                       | 24 cefotaxime-resistant <i>Enterobacteriaceae</i> isolates were obtained from the migratory population; 3 cefotaxime-resistant enterobacterial isolates were obtained from the resident population. 22 isolates displayed ESBL                                                                                                                                                                                                                                                                                                                                                                                                   | Loncaric (2013). Austria [56]          |

|                                                                                                                                                                                                            |                                                                                                                                                                                                                                                                                                                                                                                                                                                                         |                                                                                                                                                                                                                                                                                                                                                                                                     |                                                                                                                                                                                                                                                                                                                                                                                                                                                                                                                                                                                                                                                                                                                                                                                                                                                                                                                                                                                                                                                           |                                      |
|------------------------------------------------------------------------------------------------------------------------------------------------------------------------------------------------------------|-------------------------------------------------------------------------------------------------------------------------------------------------------------------------------------------------------------------------------------------------------------------------------------------------------------------------------------------------------------------------------------------------------------------------------------------------------------------------|-----------------------------------------------------------------------------------------------------------------------------------------------------------------------------------------------------------------------------------------------------------------------------------------------------------------------------------------------------------------------------------------------------|-----------------------------------------------------------------------------------------------------------------------------------------------------------------------------------------------------------------------------------------------------------------------------------------------------------------------------------------------------------------------------------------------------------------------------------------------------------------------------------------------------------------------------------------------------------------------------------------------------------------------------------------------------------------------------------------------------------------------------------------------------------------------------------------------------------------------------------------------------------------------------------------------------------------------------------------------------------------------------------------------------------------------------------------------------------|--------------------------------------|
| population in Wulkaprodersdorf. Source: Rooks ( <i>Corvus frugilegus</i> ) 2 populations: migratory and a resident population.                                                                             | population. Number of isolates is reported                                                                                                                                                                                                                                                                                                                                                                                                                              | resistant <i>Staphylococcus aureus</i> . Isolation of cefotaxime resistant isolates.                                                                                                                                                                                                                                                                                                                | phenotype, and 5 isolates displayed AmpC phenotype, wherefrom 3 <i>Enterobacter</i> isolates were stably depressed AmpC-producer. The most prevalent genes in ESBL-producing isolates were from the blaCTX-M group. 5 isolates of MRSA: detected in 5 samples of the migratory population; resident population - none. In all 5 isolates the production of beta-lactamase was confirmed. All 5 isolates were mecA and PVL positive. 44.4% of the faecal samples (24 of 54) in the migrating population showed at least resistance to one of the tested antibiotics compared to 2.9% (3 of 102) in the resident population. Migratory population: detected resistance to ampicillin and piperacillin antibiotics, tetracycline (85% of the isolates), trimethoprim/sulfamethoxazole (62%) and chloramphenicol (48%). Resident population: 3 cefotaxime-resistant isolates showed phenotypic resistance to ampicillin, piperacillin, and tobramycin.                                                                                                        |                                      |
| Locality: Nationwide. Source: Wild boars ( <i>Sus scrofa</i> ), roe deer ( <i>Capreolus capreolus</i> ), wild ducks (family Anatidae, subfamily Anatinae) and geese (family Anatidae, subfamily Anserinae) | Period: 2016 (wild boar), 2017 (roe deer), 2019 (wild ducks and geese). Sampling: National Zoonoses Monitoring Program. Faecal samples. Nasal swabs from wild boars. Tested in the National Reference Laboratories. Samples from wild ducks and geese originated from cadavers collected for the monitoring of avian influenza, or taken from hunted birds. Number of samples: 942 samples from hunted wild boars, 573 from roe deer and 100 from wild ducks and geese. | <i>Salmonella</i> spp. (in wild boars and wild ducks and geese), <i>Campylobacter</i> spp. (in roe deer and wild ducks and geese), Shiga toxin-producing <i>E. coli</i> (STEC), commensal <i>E. coli</i> and extended-spectrum beta-lactamase- (ESBL) or ampicillinase class C (AmpC) beta-lactamase-producing <i>E. coli</i> . MRSA in boars. Resistance test was not carried out in all isolates. | <i>Salmonella</i> spp.: isolated from wild boar (13 isoaltes, 2.4% samples), wild ducks and geese faecal samples. <i>Campylobacter</i> spp.: roe deer (4 samples, 0.8%), wild ducks and geese faecal samples. STEC: wild boar (37, 6.9%), roe deer (144, 40.2%) faecal samples. MRSA: wild boar nasal swabs (5 samples). Commensal <i>E. coli</i> : wild boar (511 samples, 95%), roe deer (537, 93.7%), wild ducks and geese (51, 50.0%) faecal samples. ESBL-/AmpC-producing <i>E. coli</i> : wild boar (36, 6.5%), roe deer (13, 2.3%), wild ducks and geese (10, 9.8%) faecal samples. Wild boars: <i>Salmonella</i> spp. - chloramphenicol, nalidixic acid, ciprofloxacin, ampicillin, colistin, tetracycline - 9.1%, 2x resistant and 3x resistant- 9.1%; STEC - gentamicin (4.2%), chloramphenicol (4.2%), nalidixic acid (4.2%), ciprofloxacin (4.2%), ampicillin (4.2%), sulfamethoxazole (4.2%), trimethoprim (4.2%), tetracycline (4.2%), >4x resistant (4.2%); Commensal <i>E. coli</i> <1% resistant; ESBL-/AmpC- producing <i>E. coli</i> - | Plaza-Rodríguez (2020). Germany [57] |

|                                                                             |                                                                                                                                         |                                    |                                                                                                                                                                                                                                                                                                                                                                                                                                                                                                                                                                                                                                                                                                                                                                                                                                                                                                                                                                                                                                                                                                                                                                                                                                                                                                                                                                                                                                                                                                       |                                |
|-----------------------------------------------------------------------------|-----------------------------------------------------------------------------------------------------------------------------------------|------------------------------------|-------------------------------------------------------------------------------------------------------------------------------------------------------------------------------------------------------------------------------------------------------------------------------------------------------------------------------------------------------------------------------------------------------------------------------------------------------------------------------------------------------------------------------------------------------------------------------------------------------------------------------------------------------------------------------------------------------------------------------------------------------------------------------------------------------------------------------------------------------------------------------------------------------------------------------------------------------------------------------------------------------------------------------------------------------------------------------------------------------------------------------------------------------------------------------------------------------------------------------------------------------------------------------------------------------------------------------------------------------------------------------------------------------------------------------------------------------------------------------------------------------|--------------------------------|
|                                                                             |                                                                                                                                         |                                    | <p>gentamicin (20%), chloramphenicol (16%), cefotaxime (100%), ceftazidime (96%), nalidixic acid (16%), ciprofloxacin (32%), ampicillin (100%), sulfamethoxazole (28%), trimethoprim (24%), tetracycline (36%), azithromycin (8%), 44% 2x resistant, 20% 3x resistant, 32% &gt;4x resistant.</p> <p>Roe deer: STEC - gentamicin (0.8%); commensal <i>E. coli</i> - cefotaxime (0.4%), ceftazidime (0.4%), ciprofloxacin (0.4%), ampicillin (1.5%), sulfamethoxazole (1.1%), trimethoprim (0.7%), tetracycline (0.7%), azithromycin (0.4%), &gt;4x resistant (1 isolate, 0.4%); ESBL-/AmpC-producing <i>E. coli</i> - gentamicin (8.3%), cefotaxime (100%), ceftazidime (100%), ciprofloxacin (8.3%), ampicillin (100%), sulfamethoxazole (16.7%), trimethoprim (16.7%), tetracycline (8.3%), 2x resistant (75%), 3x resistant (16.7%), &gt;4x resistant (8.3%)</p> <p>Wild ducks and geese: Commensal <i>E. coli</i> - gentamicin (2%), cefotaxime (2%), ceftazidime (2%), nalidixic acid (2%), ciprofloxacin (2%), ampicillin (10.2%), colistin (2%), sulfamethoxazole (6.1%), trimethoprim (2%), tetracycline (2%), 2x resistant (2%), 3x resistant (4.1%); ESBL-/AmpC-producing <i>E. coli</i> - gentamicin (20%), cefotaxime (100%), ceftazidime (100%), nalidixic acid (50%), ciprofloxacin (50%), ampicillin (100%), sulfamethoxazole (60%), trimethoprim (20%), tetracycline (20%), azithromycin (10%), 2x resistant (30%), 3x resistant (20%), 4x resistant (10%), &gt;4x resistant (40%)</p> |                                |
| Locality: Brandenburg, Mecklenburg-Western Pomerania.<br>Source: Wild boars | Period: February 2015 - December 2016. Sampling: Tonsils of hunted wild boars. Number of samples: 503. Number of isolates: 10           | <i>Yersinia pseudotuberculosis</i> | 32 samples (6.4%): <i>Y. pseudotuberculosis</i> was detected. The isolates were susceptible to most antimicrobials. 4 isolates exhibited growth at trimethoprim; all strains grew at high concentrations of colistin-sulfate                                                                                                                                                                                                                                                                                                                                                                                                                                                                                                                                                                                                                                                                                                                                                                                                                                                                                                                                                                                                                                                                                                                                                                                                                                                                          | Reinhardt (2018). Germany [58] |
| Locality: Berlin.<br>Source: Wild birds                                     | Period: 2011 - 2014. Sampling: Rescued wild birds, the small animal clinic, 40 different avian species. Sampled once, the cloacal swab. | ESBL-producing <i>E. coli</i>      | 24 (7.5% of samples) isolates of ESBL/AmpC-producing <i>E. coli</i> . Dominance of blaCTX-M-1 (60%) and blaCTX-M-15 (40%) for phenotypic ESBL-producers. Common ARGs: blaTEM-1, blaOXA-1,                                                                                                                                                                                                                                                                                                                                                                                                                                                                                                                                                                                                                                                                                                                                                                                                                                                                                                                                                                                                                                                                                                                                                                                                                                                                                                             | Schaufler (2016). Germany [59] |

|                                                                                                                                    |                                                                                                                                                                                                                                                                                                                     |                                        |                                                                                                                                                                                                                                                                                                                                                                                                                                                                                                                                                                                                     |                                  |
|------------------------------------------------------------------------------------------------------------------------------------|---------------------------------------------------------------------------------------------------------------------------------------------------------------------------------------------------------------------------------------------------------------------------------------------------------------------|----------------------------------------|-----------------------------------------------------------------------------------------------------------------------------------------------------------------------------------------------------------------------------------------------------------------------------------------------------------------------------------------------------------------------------------------------------------------------------------------------------------------------------------------------------------------------------------------------------------------------------------------------------|----------------------------------|
|                                                                                                                                    | Number of samples: 320. 24 ESBL-producing <i>E. coli</i> isolates.                                                                                                                                                                                                                                                  |                                        | tetA/B, sul1, sul2, sul3, strA/strB. 14 of 24 isolates (4% of samples) were MDR.                                                                                                                                                                                                                                                                                                                                                                                                                                                                                                                    |                                  |
| Locality: Berlin, urban centre. Source: Flies                                                                                      | Period: July 2016. Sampling: Sampling sites: 4 sites within a quadrant of 5 km in the city centre of Berlin. Flies: blowflies ( <i>Diptera Calliphoridae</i> ), houseflies ( <i>Diptera Muscidae</i> ), or flesh flies ( <i>Diptera Sarcophagidae</i> ). Number of samples: 163. Number of isolates: 24             | ESBL-producing <i>E. coli</i>          | 21 (12.9%) samples were positive for ESBL-producing <i>E. coli</i> . 10 samples with ESBL-producing <i>E. coli</i> (6%) showed a co-resistance to fluoroquinolones (ciprofloxacin). 5 ESBL-positive fly samples (3%) showed additional non-susceptibility to the group of folic acid antagonists (trimethoprim/sulfamethoxazole). No resistances to carbapenems or colistin were detected. ARG CTX-M-1 was the most prevalent type 15 (of 24)                                                                                                                                                       | Wetzker (2019). Germany [60]     |
| Locality: the Swiss Ornithological Institute in Sempach. Source: Wild birds admitted to the care centre, the rehabilitation centre | Period: May - October 2018. Sampling: From live birds, swabs of freshly passed faeces, from dead birds a faecal swab from the cloaca; 55 different species. The majority (246/83.7%) were nestlings, pulli, or juvenile birds. Number of samples: 294 faecal swabs from 294 wild birds. 256 <i>E. coli</i> isolates | antimicrobial resistant <i>E. coli</i> | 17 samples (5.8%) contained 19 AMR <i>E. coli</i> isolates, where of 26.3% were MDR. Five (1.7%) ESBL-producing <i>E. coli</i> . Within AMR <i>E. coli</i> , high rates of resistance to ampicillin (8/19 isolates), nalidixic acid (8/19), and tetracycline (10/19) were observed. Resistance to chloramphenicol (5/19), ciprofloxacin (4/19), cefazolin (4/19), streptomycin (5/19), and sulfamethoxazole/trimethoprim (5/19) were less often detected, and resistance to amoxicillin/clavulanic acid (1/19), azithromycin (2/19), nitrofurantoin (1/19), gentamicin (2/19), and kanamycin (2/19) | Zurfluh (2019). Switzerland [61] |

Table S7. Presence of antibiotic resistance or antibiotic resistance genes in sediment and soil as reported in the included studies (n = 10)

| Source                                                                                                                                                                                                      | Samples                                                                                                                                                                                                              | Target                                                          | Reported ARB, ARGs presence                                                                                                                                                                                                                                                                                                                                                                                                                                                                                                                                                                                                                                                                                         | Refs                               |
|-------------------------------------------------------------------------------------------------------------------------------------------------------------------------------------------------------------|----------------------------------------------------------------------------------------------------------------------------------------------------------------------------------------------------------------------|-----------------------------------------------------------------|---------------------------------------------------------------------------------------------------------------------------------------------------------------------------------------------------------------------------------------------------------------------------------------------------------------------------------------------------------------------------------------------------------------------------------------------------------------------------------------------------------------------------------------------------------------------------------------------------------------------------------------------------------------------------------------------------------------------|------------------------------------|
| Locality: Baltic Sea and North Sea coastline (environmental isolates), bathing sites. Source: Coastal water, sediment, bivalve mollusks                                                                     | Period: 2004–2012, 2009–2014. Sampling: not reported. Number of samples (isolates): <i>V. cholerae</i> : 131; <i>V. vulnificu</i> : 122. Isolates: 141 <i>V. vulnificus</i> ; 184 <i>V. cholerae</i> non-O1/non-O139 | <i>V. cholerae</i> non-O1/non-O139; <i>V. vulnificu</i>         | 15% showed full resistance to at least one antimicrobial agent. None of the <i>V. cholerae</i> isolates showed multidrug resistance. Non-susceptible strains: 34% in <i>V. cholerae</i> ; 41% in <i>V. vulnificu</i> . <i>V. cholerae</i> : amoxicillin/clavulanic acid 0; ampicillin 10 (7.6%); imipenem 3 (2.3%); meropenem 1; nalidixic acid 0; streptomycin 2 (1.5%); trimethoprim 0. <i>V. vulnificu</i> : streptomycin 2%; ampicillin 11%                                                                                                                                                                                                                                                                     | Bier (2015). Germany [62]          |
| Locality: Vidy Bay, Lake Geneva. Source: Freshwater lake sediments                                                                                                                                          | Period: Aug 2011. Sampling: Short sediment cores taken at 22 sites during two sampling campaigns. Number of samples: not reported                                                                                    | ARGs: sul1, sul2, tet(B), tet(M), tet(W) and qnrA               | ARG abundance generally decreased from sul1 over sul2, tet(w), tet(M) to tet(B); qnrA was detected in low amounts and only in hospital sewage; sul and tet were more abundant in both WWTP influent and effluent samples, with sul1 abundance always being the highest. For all the detected ARGs, highest gene concentrations and abundances occurred at sites in close proximity to the WWTP discharge                                                                                                                                                                                                                                                                                                            | Czekalski (2014). Switzerland [64] |
| Locality: Vidy Bay (Lake Geneva), Lausanne. Source: Hospital and municipal raw sewage, treated effluent from Lausanne's WWTP, lake water, sediment samples close to WWTP and close to a drinking water pump | Period: not reported. Sampling: 3 sampling campaigns. 1 L wastewater, lake water, sediment. Number of samples: not reported. 163 isolates from wastewater.                                                           | -                                                               | Clinical wastewater: <i>Enterococci</i> and <i>Brevundimonas</i> were dominant; <i>Escherichia/Shigella</i> and <i>Acidovorax</i> species dominated the WWTP isolates. 17 genera were identified among the lake water bacteria. Sediment: <i>Bacillus</i> , <i>Solibacillus</i> , <i>Brevundimonas</i> were frequent. 76% of hospital and 77% of WWTP isolates resistant to sulfamethoxazole/trimethoprim and streptomycin were additionally resistant to ampicillin. WWTP: 55% resistant to chloramphenicol, 67% resistant to nalidixic acid. MDR to 6–8 antibiotics: 86 and 77% in hospital wastewater, 82–60% wastewater. MDR <i>Pseudomonas</i> and <i>Escherichia/Shigella</i> were present at all 3 locations | Czekalski (2012). Switzerland [63] |
| Locality: Vidy Bay, Lake Geneva. Source: Sediments from the                                                                                                                                                 | Period: May 2012. Sampling: 3 sites; 35–60m depth, surface sediment. Number of samples: not reported. 141 isolates                                                                                                   | <i>Pseudomonas</i> spp: <i>P. putida</i> , <i>P. aeruginosa</i> | 12–54% of antibiotic resistance among the isolates. MDR isolates were identified in all 3 sampling areas; 2 isolates were resistant to 16 antibiotics. Beta-lactamases in the studied <i>Pseudomonas</i> spp: ctx-m 47%, vim-2 19%, vim-1 22%, ndm 6%, shv - 6%. 38 and 58% of the isolates were resistant to streptomycin and cefoperazone, respectively; 54% to ofloxacin; 22% -                                                                                                                                                                                                                                                                                                                                  | Devarajan (2017). Switzerland [65] |

|                                                                                                                                                                                           |                                                                                                                                                                                                                                            |                                                                                                               |                                                                                                                                                                                                                                                                                                                                                                                                                                                                                                                                                                                                                                                                                        |                                  |
|-------------------------------------------------------------------------------------------------------------------------------------------------------------------------------------------|--------------------------------------------------------------------------------------------------------------------------------------------------------------------------------------------------------------------------------------------|---------------------------------------------------------------------------------------------------------------|----------------------------------------------------------------------------------------------------------------------------------------------------------------------------------------------------------------------------------------------------------------------------------------------------------------------------------------------------------------------------------------------------------------------------------------------------------------------------------------------------------------------------------------------------------------------------------------------------------------------------------------------------------------------------------------|----------------------------------|
|                                                                                                                                                                                           |                                                                                                                                                                                                                                            |                                                                                                               | norfloxacin; <20%: imipenem, ceftazidime, piperacillin-tazobactam, cefepime, piperacillin                                                                                                                                                                                                                                                                                                                                                                                                                                                                                                                                                                                              |                                  |
| Locality: the Lake Brêt. Source: Sediments from the Lake Brêt used as drinking-water reservoir                                                                                            | Period: Sep 2017. Sampling: Sites: in the middle of the lake, 3m from the shore, on the water line, and input location in the lake of an agricultural drain. Number of samples: not reported                                               | ARGs: blaTEM, blaSHV, blaCTX-M and blaNDM                                                                     | blaTEM and blaSHV were found in all sampling sites; blaCTX-M—only in the samples from the shore; blaNDM gene was not identified in sediments; high abundance of blaTEM and blaSHV were observed in the center of the lake; sul1 and sul2 were detected in all the studied sites. On agricultural soil, blaCTX-M, blaNDM, and sul1 were not quantifiable                                                                                                                                                                                                                                                                                                                                | Laffite (2020). Switzerland [66] |
| Locality: Rax, Regelsbrunn. Source: Soil and water                                                                                                                                        | Period: 2007 - 2009. Sampling: 12 sampling areas, samples of soil with different compositions at different altitudes (0 to 500 m, 500 to 1,000 m, and >1,500 m). Number of samples: 467 soil and 68 water samples                          | <i>Listeria</i> species                                                                                       | 30% (n = 140) were determined to be positive for <i>Listeria spp.</i> , of which 28 samples (6%) were <i>L. monocytogenes</i> positive. <i>Listeria</i> was isolated from 26.5% of water samples. 26 <i>L. monocytogenes</i> isolates were tested for resistance. <i>L. monocytogenes</i> strains: 88.46% resistant against cefotaxime, 65.4% - erythromycin, 35%, 12%, and 6% of <i>L. monocytogenes</i> test strains were resistant to ceftriaxone, ciprofloxacin, and linezolid                                                                                                                                                                                                     | Linke (2014). Austria [69]       |
| Locality: The urban park Berlin Tiergarten and the abandoned sewage field Berlin-Buch. Source: Soil under anthropogenic influences and soil which used to be under wastewater application | Period: not reported. Sampling: From each site 1000 g of soil sample was collected, depth 3- 15 cm. Number of samples: 6                                                                                                                   | ampC, tet (O), ermB, SHV-5, mecA, and vanA                                                                    | ARGs were not quantified in the German soil                                                                                                                                                                                                                                                                                                                                                                                                                                                                                                                                                                                                                                            | Malik (2008). Germany, India[70] |
| Locality: The Kraichbach River, Baden-Württemberg. Source: WWTP-impacted river in surface water, sediment, and biofilm. The river is                                                      | Period: February - June 2019. Sampling: Surface water - grab sampling, sediment - core sampling (5 cm), and biofilm - passive sampling. 5 sampling campaigns. Number of samples: 20, details are not reported. Number of isolates reported | blaTEM, ermB, tetM, and sul1 in all samples. Not all of the samples and isolates were analyzed for resistance | Two sediment samples and two biofilm samples (one upstream and one downstream) were tested for antibiotic resistance. The selected isolates from sediment: <i>Klebsiella</i> , <i>Enterobacter</i> , <i>Citrobacter</i> (3 isolates), <i>E. coli</i> (3 isolates), and <i>Acinetobacter</i> . Many isolates were resistant to cephalosporins (either cefotaxime or ceftazidime, or both). No isolate collected upstream of the WWTP was classified as 3MRGN or 4MRGN. Downstream of the WWTP, the isolates belonged to the species <i>P. aeruginosa</i> (5 isolates) and <i>Acinetobacter</i> (5 isolates). <i>E. coli</i> was the only species successfully isolated from the biofilm | Reichert (2021). Germany [67]    |

|                                                                                                                                                                |                                                                                                                               |                                                                                   |                                                                                                                                                                                                                                                                                                                                                                                                                                                                                                                                                                                                                                                                                                                                                                                                                                                              |                                   |
|----------------------------------------------------------------------------------------------------------------------------------------------------------------|-------------------------------------------------------------------------------------------------------------------------------|-----------------------------------------------------------------------------------|--------------------------------------------------------------------------------------------------------------------------------------------------------------------------------------------------------------------------------------------------------------------------------------------------------------------------------------------------------------------------------------------------------------------------------------------------------------------------------------------------------------------------------------------------------------------------------------------------------------------------------------------------------------------------------------------------------------------------------------------------------------------------------------------------------------------------------------------------------------|-----------------------------------|
| the effluent receptor of 6 WWTPs                                                                                                                               |                                                                                                                               |                                                                                   |                                                                                                                                                                                                                                                                                                                                                                                                                                                                                                                                                                                                                                                                                                                                                                                                                                                              |                                   |
| Locality: Lake Geneva: The Bay of Vidy and the Creux de Genthod region. Source: Sediment from 2 sites: close to the outlet pipes of WWTP and coastal area      | Period: not reported. Sampling: Sediment cores at different depths. Number of samples: not reported                           | <i>E. coli</i> and <i>Enterococcus</i> ; ARGs: beta-lactams, aadA, tet, cmlA, van | <i>E. coli</i> MDR: 0.12% - 4.6%; <i>Enterococcus</i> MDR: 0.016% - 11.6%. <i>E. coli</i> beta-lactams resistant: 21.94 - 48.22%; <i>Enterococcus</i> beta-lactams resistant: 15.92 - 36.82%. aadA found in all the studied samples                                                                                                                                                                                                                                                                                                                                                                                                                                                                                                                                                                                                                          | Thevenon (2012). Switzerland [68] |
| Locality: Maize and potato growing regions. Source: Agricultural soils: 50 maize and 50 potato fields not yet exposed to but eligible for GMO crop cultivation | Period: Aug-Sep 2011. Sampling: 10 single soil extractions from each field; extraction layer: 0-25 cm. Number of samples: 100 | nptII, nptIII (present in transgenic plants)                                      | 85 (85%) soil samples were positive for nptIII and 6 (6%) for nptII. Potato fields: nptII - 6%; nptIII - 78%. Maize: nptII - 6%; nptIII -92%. 400 kanamycin-resistant strains. Strains: Maize - taxons of <i>Sphingobacteriaceae</i> ( <i>Pedobacter</i> sp.), <i>Flavobacteriaceae</i> ( <i>Chryseobacterium</i> sp.), <i>Rhizobiaceae</i> ( <i>Ensifer</i> sp.) and <i>Xanthomonadaceae</i> ( <i>Stenotrophomonas</i> ); Potato - <i>Rhizobiaceae</i> ( <i>Ensifer adhaerens</i> ), <i>Sphingobacteriaceae</i> ( <i>Pedobacter</i> sp.), <i>Flavobacteriaceae</i> , and <i>Chitinophagaceae</i> . 3 maize and 3 potato fields carried bacterial strains known as human pathogens: <i>Klebsiella pneumoniae</i> , <i>Stenotrophomonas maltophilia</i> . Kanamycin resistance: Maize - mean 6.22%, range 0.34 - 16%; Potato: mean 5.42%, range 0.14 - 10.94% | Woegerbauer (2015). Austria [71]  |

Table S8. Reported resistance patterns categorized by associated antibiotic class, WHO CIA list rank and environmental reservoir.

| Environment      | WHO CIA list category                  | Antibiotic Class                | Reported resistance | Samples                                                                                             |
|------------------|----------------------------------------|---------------------------------|---------------------|-----------------------------------------------------------------------------------------------------|
| Animal husbandry | Critically important: Highest Priority | Polymyxins                      | mcr-1               | Farm sites [Germany, 2011-2012 (Guenther)]                                                          |
| Animal husbandry | Critically important: Highest Priority | Third-generation cephalosporins | cefotaxime          | Wastewater [Germany, Dec2016-Sep2018 (Savin)]                                                       |
| Animal husbandry | Critically important: Highest Priority | Third-generation cephalosporins | ceftazidime         | Wastewater [Germany, Dec2016-Sep2018 (Savin)]                                                       |
| Animal husbandry | Critically important: High Priority    | Carboxypenicillins              | temocillin          | Wastewater [Germany, Dec2016-Sep2018 (Savin)]                                                       |
| Animal husbandry | Critically important: High Priority    | Macrolides                      | erythromycin        | Dust,manure [Germany, Feb2013-Sep2013 (Schoenfelder)]                                               |
| Animal husbandry | Critically important: High Priority    | Phosphonics                     | fosfomycin          | Wastewater [Germany, Dec2016-Sep2018 (Savin)];Dust,manure [Germany, Feb2013-Sep2013 (Schoenfelder)] |
| Animal husbandry | Critically important: High Priority    | Rifamycins                      | rifampicin          | Dust,manure [Germany, Feb2013-Sep2013 (Schoenfelder)]                                               |
| Animal husbandry | Highly important                       | Amphenicols                     | chloramphenicol     | Dust,manure [Germany, Feb2013-Sep2013 (Schoenfelder)]                                               |
| Animal husbandry | Highly important                       | Amphenicols                     | florfenicol         | Dust,manure [Germany, Feb2013-Sep2013 (Schoenfelder)]                                               |
| Animal husbandry | Highly important                       | Lincosamides                    | clindamycin         | Dust,manure [Germany, Feb2013-Sep2013 (Schoenfelder)]                                               |
| Animal husbandry | Highly important                       | Penicillins                     | benzylpenicillin    | Dust,manure [Germany, Feb2013-Sep2013 (Schoenfelder)]                                               |
| Animal husbandry | Highly important                       | Penicillins                     | oxacillin           | Dust,manure [Germany, Feb2013-Sep2013 (Schoenfelder)]                                               |
| Animal husbandry | Highly important                       | Penicillins                     | piperacillin        | Wastewater [Germany, Dec2016-Sep2018 (Savin)]                                                       |
| Animal husbandry | Highly important                       | Sulfonamides                    | sul1                | Piggery manure [Germany, May-Jun2006 (Binh)];Piggery manure [Germany, 2012 (Wolters)]               |
| Animal husbandry | Highly important                       | Sulfonamides                    | sul2                | Piggery manure [Germany, May-Jun2006 (Binh)];Piggery manure [Germany, 2012 (Wolters)]               |
| Animal husbandry | Highly important                       | Sulfonamides                    | sul3                | Piggery manure [Germany, May-Jun2006 (Binh)];Piggery manure [Germany, 2012 (Wolters)]               |
| Animal husbandry | Highly important                       | Tetracyclines                   | doxycycline         | Piggery manure [Germany, 2002-2003 (Schwaiger)]                                                     |
| Animal husbandry | Highly important                       | Tetracyclines                   | tetracycline        | Dust,manure [Germany, Feb2013-Sep2013 (Schoenfelder)]                                               |

|                  |                                        |                                         |                                |                                                                                                                                                                                                                         |
|------------------|----------------------------------------|-----------------------------------------|--------------------------------|-------------------------------------------------------------------------------------------------------------------------------------------------------------------------------------------------------------------------|
| Animal husbandry | Highly important                       | Trimethoprim - sulfonamide combinations | trimethoprim /sulfamethoxazole | Dust,manure [Germany, Feb2013-Sep2013 (Schoenfelder)]                                                                                                                                                                   |
| Animal husbandry | Important                              | Aminocyclitols                          | spectinomycin                  | Dust,manure [Germany, Feb2013-Sep2013 (Schoenfelder)]                                                                                                                                                                   |
| Animal husbandry | not listed                             | Antiseptics                             | qacEdelta1                     | Piggery manure [Germany, 2012 (Wolters)]                                                                                                                                                                                |
| Animal husbandry | not listed                             | Beta lactamases                         | blaCTX-M                       | Wastewater [Germany, Dec2016-Sep2018 (Savin)]                                                                                                                                                                           |
| Animal husbandry | not listed                             | Beta lactamases                         | blaSHV                         | Wastewater [Germany, Dec2016-Sep2018 (Savin)]                                                                                                                                                                           |
| Animal husbandry | not listed                             | Beta lactamases                         | blaTEM                         | Piggery manure [Germany, May-Jun2006 (Binh)];Wastewater [Germany, Dec2016-Sep2018 (Savin)]                                                                                                                              |
| Animal husbandry | not listed                             | Beta lactamases                         | blaVIM                         | Farm sites [Germany, 2011–2012 (Fischer)]                                                                                                                                                                               |
| Animal husbandry | not listed                             | Beta lactamases                         | blaVIM-1                       | Farm sites [Germany, 2011–2012 (Fischer)]                                                                                                                                                                               |
| Wastewater       | Critically important: Highest Priority | Fluoroquinolones                        | ciprofloxacin                  | Wastewater [Austria, Sep2011-Feb2012 (Galler)];Wastewater [Germany, Apr2019-Mar2020 (Schmiege)]                                                                                                                         |
| Wastewater       | Critically important: Highest Priority | Fluoroquinolones                        | moxifloxacin                   | Wastewater [Austria, Sep2011-Feb2012 (Galler)]                                                                                                                                                                          |
| Wastewater       | Critically important: Highest Priority | Fluoroquinolones                        | norfloxacin                    | Wastewater [Austria, Sep2011-Feb2012 (Galler)]                                                                                                                                                                          |
| Wastewater       | Critically important: Highest Priority | Fluoroquinolones                        | ofloxacin                      | Wastewater [Austria, Sep2011-Feb2012 (Galler)];Wastewater [Germany, Apr2019-Mar2020 (Schmiege)]                                                                                                                         |
| Wastewater       | Critically important: Highest Priority | Glycopeptides                           | teicoplanin                    | Wastewater [Austria, Sep2011-Feb2012 (Galler)]                                                                                                                                                                          |
| Wastewater       | Critically important: Highest Priority | Glycopeptides                           | vanA                           | Hospital, municipal wastewater [Germany, 2years (Alexander)]                                                                                                                                                            |
| Wastewater       | Critically important: Highest Priority | Glycopeptides                           | vancomycin                     | Wastewater [Germany, Feb-Nov2018 (Alexander)];Wastewater(nursing home) [Germany, Nov2012-Mar2013 (Bäumlisberger)];Wastewater [Austria, Sep2011-Feb2012 (Galler)];Wastewater, surface water [Germany, 2018-2019 (Klees)] |
| Wastewater       | Critically important: Highest Priority | Polymyxins                              | colistin                       | Wastewater [Germany, Feb-Nov2018 (Alexander)];WWPT [Germany, not reported (Hembach)];Clinical,urban wastewater [Germany, Sep2016-                                                                                       |

|            |                                        |                                 |                |                                                                                                                                                                                                                                                                                              |
|------------|----------------------------------------|---------------------------------|----------------|----------------------------------------------------------------------------------------------------------------------------------------------------------------------------------------------------------------------------------------------------------------------------------------------|
|            |                                        |                                 |                | Jul2017 (Müller)];Rural wastewater [Germany, Sep2016-Jul2017 (Müller)]                                                                                                                                                                                                                       |
| Wastewater | Critically important: Highest Priority | Polymyxins                      | mcr-1          | WWPT [Germany, May2018-Apr2019 (Schages)]                                                                                                                                                                                                                                                    |
| Wastewater | Critically important: Highest Priority | Quinolones                      | nalidixic acid | Wastewater [Austria, Sep2011-Feb2012 (Galler)];Wastewater [Austria, Apr-Sep2000 (Reinthal)]                                                                                                                                                                                                  |
| Wastewater | Critically important: Highest Priority | Quinolones                      | quinolones     | WWPT effluent [Germany and Namibia, here report for Germany, not reported (Agrawal)];WWPT influent [Germany and Namibia, here report for Germany, not reported (Agrawal)];Wastewater(nursing home) [Germany, Nov2012-Mar2013 (Bäumlisberger)];Wastewater [Austria, Sep2011-Feb2012 (Galler)] |
| Wastewater | Critically important: Highest Priority | Third-generation cephalosporins | cefotaxime     | Clinical,urban wastewater [Germany, Sep2016-Jul2017 (Müller)];Rural wastewater [Germany, Sep2016-Jul2017 (Müller)];Wastewater [Germany, Apr2019-Mar2020 (Schmiege)]                                                                                                                          |
| Wastewater | Critically important: Highest Priority | Third-generation cephalosporins | ceftazidime    | Clinical,urban wastewater [Germany, Sep2016-Jul2017 (Müller)];Rural wastewater [Germany, Sep2016-Jul2017 (Müller)];Wastewater [Germany, Apr2019-Mar2020 (Schmiege)]                                                                                                                          |
| Wastewater | Critically important: High Priority    | Aminoglycosides                 | amikacin       | WWPT [Switzerland, 2012-2019 (Biggel)]                                                                                                                                                                                                                                                       |
| Wastewater | Critically important: High Priority    | Aminoglycosides                 | aminoglycoside | WWPT effluent [Germany and Namibia, here report for Germany, not reported (Agrawal)];WWPT influent [Germany and Namibia, here report for Germany, not reported (Agrawal)];Wastewater(nursing home) [Germany, Nov2012-Mar2013 (Bäumlisberger)];Wastewater [Austria, Sep2011-Feb2012 (Galler)] |
| Wastewater | Critically important: High Priority    | Aminoglycosides                 | aph3a          | Wastewater(Danube River) [9 countries including Germany and Austria, Aug.Sep2017 (Alygizakis)]                                                                                                                                                                                               |
| Wastewater | Critically important: High Priority    | Aminoglycosides                 | gentamicin     | Wastewater [Austria, Sep2011-Feb2012 (Galler)]                                                                                                                                                                                                                                               |
| Wastewater | Critically important: High Priority    | Carbapenems                     | carbapenem     | Wastewater [Germany, Feb-Nov2018 (Alexander)];WWPT [Switzerland, 2012-2019                                                                                                                                                                                                                   |

|            |                                        |                                             |                                             |                                                                                                                                                                                                                                                                                             |
|------------|----------------------------------------|---------------------------------------------|---------------------------------------------|---------------------------------------------------------------------------------------------------------------------------------------------------------------------------------------------------------------------------------------------------------------------------------------------|
|            |                                        |                                             |                                             | (Biggel)];Clinical,urban wastewater [Germany, Sep2016-Jul2017 (Müller)];Rural wastewater [Germany, Sep2016-Jul2017 (Müller)]                                                                                                                                                                |
| Wastewater | Critically important:<br>High Priority | Macrolide–<br>lincosamide–<br>streptogramin | macrolide–<br>lincosamide–<br>streptogramin | WWPT effluent [Germany and Namibia, here report for Germany, not reported (Agrawal)];WWPT influent [Germany and Namibia, here report for Germany, not reported (Agrawal)]                                                                                                                   |
| Wastewater | Critically important:<br>High Priority | Macrolides                                  | ermB                                        | Wastewater(Danube River) [9 countries including Germany and Austria, Aug.Sep2017 (Alygizakis)];WWPT [Germany, not reported (Hembach)];Hospital, municipal wastewater [Germany, 2years (Alexander)]                                                                                          |
| Wastewater | Critically important:<br>High Priority | Macrolides                                  | erythromycin                                | Wastewater [Austria, Sep2011-Feb2012 (Galler)]                                                                                                                                                                                                                                              |
| Wastewater | Critically important:<br>High Priority | Macrolides                                  | macrolide                                   | WWPT effluent [Germany and Namibia, here report for Germany, not reported (Agrawal)];WWPT influent [Germany and Namibia, here report for Germany, not reported (Agrawal)];Wastewater [Germany, Feb-Nov2018 (Alexander)];Wastewater(nursing home) [Germany, Nov2012-Mar2013 (Bäumlisberger)] |
| Wastewater | Critically important:<br>High Priority | Phosphonics                                 | fosfomycin                                  | WWPT [Switzerland, 2012-2019 (Biggel)]                                                                                                                                                                                                                                                      |
| Wastewater | Critically important:<br>High Priority | Rifamycins                                  | rifamycin                                   | WWPT effluent [Germany and Namibia, here report for Germany, not reported (Agrawal)];WWPT influent [Germany and Namibia, here report for Germany, not reported (Agrawal)]                                                                                                                   |
| Wastewater | Highly important                       | Amphenicols                                 | chloramphenicol                             | Wastewater [Germany, Apr2019-Mar2020 (Schmiege)]                                                                                                                                                                                                                                            |
| Wastewater | Highly important                       | Cephalosporins                              | cephalosporin                               | WWPT effluent [Germany and Namibia, here report for Germany, not reported (Agrawal)]                                                                                                                                                                                                        |
| Wastewater | Highly important                       | First-generation cephalosporins             | cefalotin                                   | Wastewater [Austria, Apr-Sep2000 (Reinthal)]                                                                                                                                                                                                                                                |
| Wastewater | Highly important                       | Lincosamides                                | clindamycin                                 | Wastewater [Austria, Sep2011-Feb2012 (Galler)]                                                                                                                                                                                                                                              |
| Wastewater | Highly important                       | Penicillins                                 | ampicillin                                  | Wastewater [Austria, Sep2011-Feb2012 (Galler)];Wastewater [Austria, Apr-Sep2000 (Reinthal)]                                                                                                                                                                                                 |
| Wastewater | Highly important                       | Penicillins                                 | piperacillin                                | Wastewater [Austria, Apr-Sep2000 (Reinthal)];Wastewater [Germany, Apr2019-Mar2020 (Schmiege)]                                                                                                                                                                                               |

|            |                  |                                         |                                |                                                                                                                                                                                                                                                                                                                                                                                         |
|------------|------------------|-----------------------------------------|--------------------------------|-----------------------------------------------------------------------------------------------------------------------------------------------------------------------------------------------------------------------------------------------------------------------------------------------------------------------------------------------------------------------------------------|
| Wastewater | Highly important | Second-generation cephalosporins        | cefuroxime                     | Wastewater [Austria, Apr-Sep2000 (Reinthal)]                                                                                                                                                                                                                                                                                                                                            |
| Wastewater | Highly important | Streptogramins                          | ermF                           | Wastewater(Danube River) [9 countries including Germany and Austria, Aug.Sep2017 (Alygizakis)]                                                                                                                                                                                                                                                                                          |
| Wastewater | Highly important | Sulfonamides                            | sul1                           | Wastewater(Danube River) [9 countries including Germany and Austria, Aug.Sep2017 (Alygizakis)]                                                                                                                                                                                                                                                                                          |
| Wastewater | Highly important | Sulfonamides                            | sulfonamide                    | Wastewater [Germany, Feb-Nov2018 (Alexander)];Wastewater(nursing home) [Germany, Nov2012-Mar2013 (Bäumlisberger)]                                                                                                                                                                                                                                                                       |
| Wastewater | Highly important | Tetracyclines                           | tetracycline                   | WWPT effluent [Germany and Namibia, here report for Germany, not reported (Agrawal)];WWPT influent [Germany and Namibia, here report for Germany, not reported (Agrawal)];Wastewater [Germany, Feb-Nov2018 (Alexander)];Wastewater(nursing home) [Germany, Nov2012-Mar2013 (Bäumlisberger)];Wastewater [Austria, Sep2011-Feb2012 (Galler)];Wastewater [Austria, Apr-Sep2000 (Reinthal)] |
| Wastewater | Highly important | Trimethoprim - sulfonamide combinations | trimethoprim /sulfamethoxazole | Wastewater [Austria, Sep2011-Feb2012 (Galler)];Wastewater [Austria, Apr-Sep2000 (Reinthal)];Wastewater [Germany, Apr2019-Mar2020 (Schmiege)]                                                                                                                                                                                                                                            |
| Wastewater | not listed       | Beta lactamases                         | ampC                           | Hospital, municipal wastewater [Germany, 2years (Alexander)]                                                                                                                                                                                                                                                                                                                            |
| Wastewater | not listed       | Beta lactamases                         | beta-lactames                  | Wastewater [Germany, Feb-Nov2018 (Alexander)]                                                                                                                                                                                                                                                                                                                                           |
| Wastewater | not listed       | Beta lactamases                         | blaACT-MIR                     | WWPT [Germany, May2018-Apr2019 (Schages)]                                                                                                                                                                                                                                                                                                                                               |
| Wastewater | not listed       | Beta lactamases                         | blaCMY-2                       | WWPT [Germany, not reported (Hembach)];WWPT [Germany, May2018-Apr2019 (Schages)]                                                                                                                                                                                                                                                                                                        |
| Wastewater | not listed       | Beta lactamases                         | blaCTX-M                       | WWPT [Germany, not reported (Hembach)];WWPT [Germany, May2018-Apr2019 (Schages)]                                                                                                                                                                                                                                                                                                        |
| Wastewater | not listed       | Beta lactamases                         | blaCTX-M-1                     | WWPT [Germany, May2018-Apr2019 (Schages)]                                                                                                                                                                                                                                                                                                                                               |
| Wastewater | not listed       | Beta lactamases                         | blaCTX-M-32                    | WWPT [Germany, not reported (Hembach)]                                                                                                                                                                                                                                                                                                                                                  |
| Wastewater | not listed       | Beta lactamases                         | blaCTX-M-9                     | WWPT [Germany, May2018-Apr2019 (Schages)]                                                                                                                                                                                                                                                                                                                                               |
| Wastewater | not listed       | Beta lactamases                         | blaDHA                         | WWPT [Germany, May2018-Apr2019 (Schages)]                                                                                                                                                                                                                                                                                                                                               |
| Wastewater | not listed       | Beta lactamases                         | blaFOX                         | WWPT [Germany, May2018-Apr2019 (Schages)]                                                                                                                                                                                                                                                                                                                                               |

|            |                                        |                                   |                  |                                                                                                                                                                           |
|------------|----------------------------------------|-----------------------------------|------------------|---------------------------------------------------------------------------------------------------------------------------------------------------------------------------|
| Wastewater | not listed                             | Beta lactamases                   | blaGES           | WWPT [Germany, May2018-Apr2019 (Schages)]                                                                                                                                 |
| Wastewater | not listed                             | Beta lactamases                   | blaOXA           | Wastewater(Danube River) [9 countries including Germany and Austria, Aug.Sep2017 (Alygizakis)];WWPT [Germany, May2018-Apr2019 (Schages)]                                  |
| Wastewater | not listed                             | Beta lactamases                   | blaOXA-23        | WWPT [Germany, May2018-Apr2019 (Schages)]                                                                                                                                 |
| Wastewater | not listed                             | Beta lactamases                   | blaOXA-48        | WWPT [Germany, May2018-Apr2019 (Schages)]                                                                                                                                 |
| Wastewater | not listed                             | Beta lactamases                   | blaOXA-58        | WWPT [Germany, May2018-Apr2019 (Schages)]                                                                                                                                 |
| Wastewater | not listed                             | Beta lactamases                   | blaTEM           | WWPT [Germany, not reported (Hembach)]                                                                                                                                    |
| Wastewater | not listed                             | Beta lactamases                   | blaVIM           | WWPT [Germany, May2018-Apr2019 (Schages)];Hospital, municipal wastewater [Germany, 2years (Alexander)]                                                                    |
| Wastewater | not listed                             | Beta lactamases                   | blaVIM-1         | Hospital, municipal wastewater [Germany, 2years (Alexander)]                                                                                                              |
| Wastewater | not listed                             | Beta lactamases                   | intl1            | Wastewater(Danube River) [9 countries including Germany and Austria, Aug.Sep2017 (Alygizakis)]                                                                            |
| Wastewater | not listed                             | Beta lactamases                   | methicilin       | Wastewater [Germany, Feb-Nov2018 (Alexander)]                                                                                                                             |
| Wastewater | not listed                             | Extended spectrum beta lactamases | ESBL             | Wastewater [Austria, Sep2011-Feb2012 (Galler)];Wastewater, surface water [Germany, 2018-2019 (Klees)]                                                                     |
| Wastewater | Currently not used in humans           | Aminocoumarins                    | aminocoumarin    | WWPT effluent [Germany and Namibia, here report for Germany, not reported (Agrawal)];WWPT influent [Germany and Namibia, here report for Germany, not reported (Agrawal)] |
| Water body | Critically important: Highest Priority | Fluoroquinolones                  | ciprofloxacin    | Danube, Glan, Inn, Traun [Austria, 2016 (Lepuschitz)];Drinking water [Germany, Aug2018-Jun2019 (Voigt)]                                                                   |
| Water body | Critically important: Highest Priority | Fluoroquinolones                  | fluoroquinolones | River Weser [Germany, Jul-Sep2018 (Song)];River Mur [Austria, Oct2015-Jan2016 (Zarfel)]                                                                                   |
| Water body | Critically important: Highest Priority | Fluoroquinolones                  | moxifloxacin     | Danube, Glan, Inn, Traun [Austria, 2016 (Lepuschitz)]                                                                                                                     |
| Water body | Critically important: Highest Priority | Fluoroquinolones                  | ofloxacin        | River Swist [Germany, not reported (Schreiber)];Danube, Glan, Inn, Traun [Austria, 2016 (Lepuschitz)];Drinking water [Germany, Aug2018-Jun2019 (Voigt)]                   |
| Water body | Critically important:                  | Fourth-generation cephalosporins  | cefepime         | Rivers, inland canals, streams [Switzerland, May-Aug2019 (Bleichenbacher)]                                                                                                |

|            |                                        |                                                |                             |                                                                                                                                                                               |
|------------|----------------------------------------|------------------------------------------------|-----------------------------|-------------------------------------------------------------------------------------------------------------------------------------------------------------------------------|
|            | Highest Priority                       |                                                |                             |                                                                                                                                                                               |
| Water body | Critically important: Highest Priority | Polymyxins                                     | colistin                    | Bathing waters [Germany, May-Sep2018 (Döhla)]                                                                                                                                 |
| Water body | Critically important: Highest Priority | Quinolones                                     | nalidixic acid              | River Mur [Austria, Oct2015-Jan2016 (Zarfel)]                                                                                                                                 |
| Water body | Critically important: Highest Priority | Quinolones                                     | quinolones                  | Lakes water [Switzerland, 2002-2005 (Picão)];River Weser [Germany, Jul-Sep2018 (Song)];River Mur [Austria, Oct2015-Jan2016 (Zarfel)]                                          |
| Water body | Critically important: Highest Priority | Third-generation cephalosporins                | cefotaxime                  | Rivers, inland canals, streams [Switzerland, May-Aug2019 (Bleichenbacher)];Drinking water [Germany, Aug2018-Jun2019 (Voigt)]                                                  |
| Water body | Critically important: Highest Priority | Third-generation cephalosporins                | ceftazidime                 | River Swist [Germany, not reported (Schreiber)];Drinking water [Germany, Aug2018-Jun2019 (Voigt)]                                                                             |
| Water body | Critically important: High Priority    | Aminoglycosides                                | aminoglycoside              | Ground water(Gallusquelle) [Germany, Mar2012-Jun2013 (Stange)];Rivers Rhine, Danube [Germany (and Australia), not reported (Stoll)];River Weser [Germany, Jul-Sep2018 (Song)] |
| Water body | Critically important: High Priority    | Aminopenicillin with beta-lactamase inhibitors | amoxicillin/clavulanic acid | Danube, Glan, Inn, Traun [Austria, 2016 (Lepuschitz)]                                                                                                                         |
| Water body | Critically important: High Priority    | Carbapenems                                    | carbapenem                  | River lower Lahn [Germany, Oct2011-Dec2012 (Herrig)]                                                                                                                          |
| Water body | Critically important: High Priority    | Glycylcyclines                                 | glycopeptide                | Rivers Rhine, Danube [Germany (and Australia), not reported (Stoll)]                                                                                                          |
| Water body | Critically important: High Priority    | Macrolides                                     | erythromycin                | Danube, Glan, Inn, Traun [Austria, 2016 (Lepuschitz)]                                                                                                                         |
| Water body | Critically important: High Priority    | Macrolides                                     | macrolide                   | Ground water(Gallusquelle) [Germany, Mar2012-Jun2013 (Stange)];Rivers Rhine, Danube [Germany (and Australia), not reported (Stoll)]                                           |
| Water body | Critically important: High Priority    | Phosphonics                                    | fosfomicin                  | Rural, urban water [Switzerland, 2012-2019 (Biggel)];Drinking water [Germany, Aug2018-Jun2019 (Voigt)]                                                                        |
| Water body | Highly important                       | Amphenicols                                    | chloramphenicol             | Rivers Rhine, Danube [Germany (and Australia), not reported (Stoll)]                                                                                                          |
| Water body | Highly important                       | Cephalosporins                                 | cephalosporin               | Rivers, inland canals, streams [Switzerland, May-Aug2019                                                                                                                      |

|            |                  |                                         |                                |                                                                                                                                                                                                                                   |
|------------|------------------|-----------------------------------------|--------------------------------|-----------------------------------------------------------------------------------------------------------------------------------------------------------------------------------------------------------------------------------|
|            |                  |                                         |                                | (Bleichenbacher)];River lower Lahn [Germany, Oct2011-Dec2012 (Herrig)];River Weser [Germany, Jul-Sep2018 (Song)]                                                                                                                  |
| Water body | Highly important | First-generation cephalosporins         | cefazolin                      | River Swist [Germany, not reported (Schreiber)]                                                                                                                                                                                   |
| Water body | Highly important | Penicillins                             | amoxicillin                    | River Rhine [Germany, Jun2006-Jun2007 (Stange)]                                                                                                                                                                                   |
| Water body | Highly important | Penicillins                             | ampicillin                     | River Mur [Austria, Oct2015-Jan2016 (Zarfel)]                                                                                                                                                                                     |
| Water body | Highly important | Penicillins                             | benzylpenicillin               | Danube, Glan, Inn, Traun [Austria, 2016 (Lepuschitz)]                                                                                                                                                                             |
| Water body | Highly important | Penicillins                             | oxacillin                      | River Swist [Germany, not reported (Schreiber)]                                                                                                                                                                                   |
| Water body | Highly important | Penicillins                             | penicillins                    | River lower Lahn [Germany, Oct2011-Dec2012 (Herrig)];River Weser [Germany, Jul-Sep2018 (Song)]                                                                                                                                    |
| Water body | Highly important | Penicillins                             | piperacillin                   | River Swist [Germany, not reported (Schreiber)];Drinking water [Germany, Aug2018-Jun2019 (Voigt)];River Mur [Austria, Oct2015-Jan2016 (Zarfel)]                                                                                   |
| Water body | Highly important | Second-generation cephalosporins        | cefotaxime                     | Danube, Glan, Inn, Traun [Austria, 2016 (Lepuschitz)]                                                                                                                                                                             |
| Water body | Highly important | Second-generation cephalosporins        | cefuroxime                     | River Mur [Austria, Oct2015-Jan2016 (Zarfel)]                                                                                                                                                                                     |
| Water body | Highly important | Sulfonamides                            | sulfonamide                    | Ground water(Gallusquelle) [Germany, Mar2012-Jun2013 (Stange)];Rivers Rhine, Danube [Germany (and Australia), not reported (Stoll)]                                                                                               |
| Water body | Highly important | Tetracyclines                           | tetracycline                   | River Rhine [Germany, Jun2006-Jun2007 (Stange)];Ground water(Gallusquelle) [Germany, Mar2012-Jun2013 (Stange)];Rivers Rhine, Danube [Germany (and Australia), not reported (Stoll)];River Mur [Austria, Oct2015-Jan2016 (Zarfel)] |
| Water body | Highly important | Trimethoprim                            | trimethoprim                   | Ground water(Gallusquelle) [Germany, Mar2012-Jun2013 (Stange)];Rivers Rhine, Danube [Germany (and Australia), not reported (Stoll)]                                                                                               |
| Water body | Highly important | Trimethoprim - sulfonamide combinations | trimethoprim /sulfamethoxazole | River Rhine [Germany, Jun2006-Jun2007 (Stange)];Drinking water [Germany, Aug2018-Jun2019 (Voigt)];River Weser [Germany, Jul-Sep2018 (Song)];River Mur [Austria, Oct2015-Jan2016 (Zarfel)]                                         |
| Water body | not listed       | Beta lactamases                         | beta-lactames                  | Rivers Rhine, Danube [Germany (and Australia), not reported (Stoll)]                                                                                                                                                              |

|                 |                                        |                                   |                |                                                                                                                                            |
|-----------------|----------------------------------------|-----------------------------------|----------------|--------------------------------------------------------------------------------------------------------------------------------------------|
| Water body      | not listed                             | Extended spectrum beta lactamases | ESBL           | Rural, urban water [Switzerland, 2012-2019 (Biggel)]                                                                                       |
| Water, sediment | Critically important: Highest Priority | Fluoroquinolones                  | ciprofloxacin  | Water, soil [Austria, 2007-2009 (Linke)]                                                                                                   |
| Water, sediment | Critically important: Highest Priority | Fluoroquinolones                  | norfloxacin    | Sediment(Lake Geneva) [Switzerland Democratic Republic of the Congo, India , May2012 (Devarajan)]                                          |
| Water, sediment | Critically important: Highest Priority | Fluoroquinolones                  | ofloxacin      | Sediment(Lake Geneva) [Switzerland Democratic Republic of the Congo, India , May2012 (Devarajan)];Water, soil [Austria, 2007-2009 (Linke)] |
| Water, sediment | Critically important: Highest Priority | Fluoroquinolones                  | qnrA           | Sediment(Lake Geneva) [Switzerland, Aug 11 (Czekalski)]                                                                                    |
| Water, sediment | Critically important: Highest Priority | Fourth-generation cephalosporins  | cefepime       | Sediment(Lake Geneva) [Switzerland Democratic Republic of the Congo, India , May2012 (Devarajan)]                                          |
| Water, sediment | Critically important: Highest Priority | Quinolones                        | nalidixic acid | Wastewater, sediment close to WWTP [Switzerland, not reported (Czekalski)]                                                                 |
| Water, sediment | Critically important: Highest Priority | Third-generation cephalosporins   | cefoperazone   | Sediment(Lake Geneva) [Switzerland Democratic Republic of the Congo, India , May2012 (Devarajan)]                                          |
| Water, sediment | Critically important: Highest Priority | Third-generation cephalosporins   | cefotaxime     | Water, soil [Austria, 2007-2009 (Linke)]                                                                                                   |
| Water, sediment | Critically important: Highest Priority | Third-generation cephalosporins   | ceftazidime    | Sediment(Lake Geneva) [Switzerland Democratic Republic of the Congo, India , May2012 (Devarajan)]                                          |
| Water, sediment | Critically important: Highest Priority | Third-generation cephalosporins   | ceftriaxone    | Water, soil [Austria, 2007-2009 (Linke)]                                                                                                   |
| Water, sediment | Critically important: High Priority    | Aminoglycosides                   | kanamycin      | Soil(Maize) [Austria, Aug-Sep2011 (Woegerbauer)];Soil(Potato) [Austria, Aug-Sep2011 (Woegerbauer)]                                         |
| Water, sediment | Critically important: High Priority    | Aminoglycosides                   | nptII          | Soil(Maize) [Austria, Aug-Sep2011 (Woegerbauer)];Soil(Potato) [Austria, Aug-Sep2011 (Woegerbauer)]                                         |
| Water, sediment | Critically important: High Priority    | Aminoglycosides                   | nptIII         | Soil(Maize) [Austria, Aug-Sep2011 (Woegerbauer)];Soil(Potato) [Austria, Aug-Sep2011 (Woegerbauer)]                                         |

|                 |                                     |                                         |                                |                                                                                                                                                                                                                                                    |
|-----------------|-------------------------------------|-----------------------------------------|--------------------------------|----------------------------------------------------------------------------------------------------------------------------------------------------------------------------------------------------------------------------------------------------|
| Water, sediment | Critically important: High Priority | Aminoglycosides                         | streptomycin                   | Sediment(Lake Geneva) [Switzerland Democratic Republic of the Congo, India , May2012 (Devarajan)];Coastal water Baltic, North Sea [Germany, 2004–2012.2009–2014 (Bier)];Wastewater, sediment close to WWTP [Switzerland, not reported (Czekalski)] |
| Water, sediment | Critically important: High Priority | Carbapenems                             | imipenem                       | Sediment(Lake Geneva) [Switzerland Democratic Republic of the Congo, India , May2012 (Devarajan)];Coastal water Baltic, North Sea [Germany, 2004–2012.2009–2014 (Bier)]                                                                            |
| Water, sediment | Critically important: High Priority | Carbapenems                             | meropenem                      | Coastal water Baltic, North Sea [Germany, 2004–2012.2009–2014 (Bier)]                                                                                                                                                                              |
| Water, sediment | Critically important: High Priority | Macrolides                              | erythromycin                   | Water, soil [Austria, 2007-2009 (Linke)]                                                                                                                                                                                                           |
| Water, sediment | Critically important: High Priority | Oxazolidinones                          | linezolid                      | Water, soil [Austria, 2007-2009 (Linke)]                                                                                                                                                                                                           |
| Water, sediment | Highly important                    | Amphenicols                             | chloramphenicol                | Wastewater, sediment close to WWTP [Switzerland, not reported (Czekalski)]                                                                                                                                                                         |
| Water, sediment | Highly important                    | Cephalosporins                          | cephalosporin                  | WWTP-impacted water, soil [Germany, Feb-Jun2019 (Reichert)]                                                                                                                                                                                        |
| Water, sediment | Highly important                    | Penicillins                             | ampicillin                     | Coastal water Baltic, North Sea [Germany, 2004–2012.2009–2014 (Bier)];Wastewater, sediment close to WWTP [Switzerland, not reported (Czekalski)]                                                                                                   |
| Water, sediment | Highly important                    | Penicillins                             | piperacillin                   | Sediment(Lake Geneva) [Switzerland Democratic Republic of the Congo, India , May2012 (Devarajan)]                                                                                                                                                  |
| Water, sediment | Highly important                    | Sulfonamides                            | sul1                           | Sediment(Lake Geneva) [Switzerland, Aug 11 (Czekalski)];Sediment(Lake Bret) [Switzerland, Sep 17 (Laffite)]                                                                                                                                        |
| Water, sediment | Highly important                    | Sulfonamides                            | sul2                           | Sediment(Lake Geneva) [Switzerland, Aug 11 (Czekalski)];Sediment(Lake Bret) [Switzerland, Sep 17 (Laffite)]                                                                                                                                        |
| Water, sediment | Highly important                    | Trimethoprim                            | trimethoprim                   | Coastal water Baltic, North Sea [Germany, 2004–2012.2009–2014 (Bier)]                                                                                                                                                                              |
| Water, sediment | Highly important                    | Trimethoprim - sulfonamide combinations | trimethoprim /sulfamethoxazole | Wastewater, sediment close to WWTP [Switzerland, not reported (Czekalski)]                                                                                                                                                                         |
| Water, sediment | not listed                          | Beta lactamases                         | beta-lactames                  | Sediment(Lake Geneva) [Switzerland, not reported (Thevenon)]                                                                                                                                                                                       |
| Water, sediment | not listed                          | Beta lactamases                         | blaCTX-M                       | Sediment(Lake Bret) [Switzerland, Sep 17 (Laffite)]                                                                                                                                                                                                |

|                 |                                        |                                  |                |                                                                                                                                                                                                                                                                        |
|-----------------|----------------------------------------|----------------------------------|----------------|------------------------------------------------------------------------------------------------------------------------------------------------------------------------------------------------------------------------------------------------------------------------|
| Water, sediment | not listed                             | Beta lactamases                  | blaSHV         | Sediment(Lake Bret) [Switzerland, Sep 17 (Laffite)]                                                                                                                                                                                                                    |
| Water, sediment | not listed                             | Beta lactamases                  | blaTEM         | Sediment(Lake Bret) [Switzerland, Sep 17 (Laffite)]                                                                                                                                                                                                                    |
| Wildlife        | Critically important: Highest Priority | Fluoroquinolones                 | ciprofloxacin  | Mouflons [Austria, Germany, Mar2012-Jan2016 (Loncaric)];Boars [Germany, 2016 (Plaza-Rodríguez)];Roe deer [Germany, 2017 (Plaza-Rodríguez)];Ducks, geese [Germany, 2019 (Plaza-Rodríguez)];Flies [Germany, Jul 16 (Wetzker)];Birds [Switzerland, May-Oct2018 (Zurfluh)] |
| Wildlife        | Critically important: Highest Priority | Fluoroquinolones                 | enrofloxacin   | Mouflons [Austria, Germany, Mar2012-Jan2016 (Loncaric)]                                                                                                                                                                                                                |
| Wildlife        | Critically important: Highest Priority | Fluoroquinolones                 | ofloxacin      | Mouflons [Austria, Germany, Mar2012-Jan2016 (Loncaric)];Boars [Germany, 2016 (Plaza-Rodríguez)];Roe deer [Germany, 2017 (Plaza-Rodríguez)];Ducks, geese [Germany, 2019 (Plaza-Rodríguez)];Flies [Germany, Jul 16 (Wetzker)];Birds [Switzerland, May-Oct2018 (Zurfluh)] |
| Wildlife        | Critically important: Highest Priority | Fourth-generation cephalosporins | cefquinome     | Mouflons [Austria, Germany, Mar2012-Jan2016 (Loncaric)]                                                                                                                                                                                                                |
| Wildlife        | Critically important: Highest Priority | Polymyxins                       | colistin       | Boars [Germany, 2016 (Plaza-Rodríguez)];Ducks, geese [Germany, 2019 (Plaza-Rodríguez)];Boars [Germany, Feb2015-Dec2016 (Reinhardt)]                                                                                                                                    |
| Wildlife        | Critically important: Highest Priority | Quinolones                       | nalidixic acid | Mouflons [Austria, Germany, Mar2012-Jan2016 (Loncaric)];Boars [Germany, 2016 (Plaza-Rodríguez)];Ducks, geese [Germany, 2019 (Plaza-Rodríguez)]                                                                                                                         |
| Wildlife        | Critically important: Highest Priority | Third-generation cephalosporins  | cefoperazone   | Mouflons [Austria, Germany, Mar2012-Jan2016 (Loncaric)]                                                                                                                                                                                                                |
| Wildlife        | Critically important: Highest Priority | Third-generation cephalosporins  | cefotaxime     | Mouflons [Austria, Germany, Mar2012-Jan2016 (Loncaric)];Resident rooks [Austria, Mar2013 (Loncaric)];Boars [Germany, 2016 (Plaza-Rodríguez)];Roe deer [Germany, 2017 (Plaza-Rodríguez)];Ducks, geese [Germany, 2019 (Plaza-Rodríguez)]                                 |
| Wildlife        | Critically important: Highest Priority | Third-generation cephalosporins  | ceftazidime    | Boars [Germany, 2016 (Plaza-Rodríguez)];Roe deer [Germany, 2017 (Plaza-Rodríguez)];Ducks,                                                                                                                                                                              |

|          |                                        |                                                |                             |                                                                                                                                                                                                                                      |
|----------|----------------------------------------|------------------------------------------------|-----------------------------|--------------------------------------------------------------------------------------------------------------------------------------------------------------------------------------------------------------------------------------|
|          |                                        |                                                |                             | geese [Germany, 2019 (Plaza-Rodríguez)]                                                                                                                                                                                              |
| Wildlife | Critically important: Highest Priority | Third-generation cephalosporins                | ceftiofur                   | Mouflons [Austria, Germany, Mar2012-Jan2016 (Loncaric)]                                                                                                                                                                              |
| Wildlife | Critically important: High Priority    | Aminoglycosides                                | gentamicin                  | Mouflons [Austria, Germany, Mar2012-Jan2016 (Loncaric)];Boars [Germany, 2016 (Plaza-Rodríguez)];Roe deer [Germany, 2017 (Plaza-Rodríguez)];Ducks, geese [Germany, 2019 (Plaza-Rodríguez)];Birds [Switzerland, May-Oct2018 (Zurfluh)] |
| Wildlife | Critically important: High Priority    | Aminoglycosides                                | kanamycin                   | Rodents [Germany, 2007-2008 (Guenther)];Birds [Switzerland, May-Oct2018 (Zurfluh)]                                                                                                                                                   |
| Wildlife | Critically important: High Priority    | Aminoglycosides                                | neomycin                    | Mouflons [Austria, Germany, Mar2012-Jan2016 (Loncaric)]                                                                                                                                                                              |
| Wildlife | Critically important: High Priority    | Aminoglycosides                                | strA                        | Birds [Germany, 2011-2014 (Schaufler)]                                                                                                                                                                                               |
| Wildlife | Critically important: High Priority    | Aminoglycosides                                | strB                        | Birds [Germany, 2011-2014 (Schaufler)]                                                                                                                                                                                               |
| Wildlife | Critically important: High Priority    | Aminoglycosides                                | streptomycin                | Rodents [Germany, 2007-2008 (Guenther)];Mouflons [Austria, Germany, Mar2012-Jan2016 (Loncaric)];Birds [Switzerland, May-Oct2018 (Zurfluh)]                                                                                           |
| Wildlife | Critically important: High Priority    | Aminoglycosides                                | tobramycin                  | Resident rooks [Austria, Mar2013 (Loncaric)]                                                                                                                                                                                         |
| Wildlife | Critically important: High Priority    | Aminopenicillin with beta-lactamase inhibitors | amoxicillin/clavulanic acid | Mouflons [Austria, Germany, Mar2012-Jan2016 (Loncaric)];Birds [Switzerland, May-Oct2018 (Zurfluh)]                                                                                                                                   |
| Wildlife | Critically important: High Priority    | Carboxypenicillins                             | ticarcillin                 | Rodents [Germany, 2007-2008 (Guenther)]                                                                                                                                                                                              |
| Wildlife | Critically important: High Priority    | Macrolides                                     | azithromycin                | Boars [Germany, 2016 (Plaza-Rodríguez)];Roe deer [Germany, 2017 (Plaza-Rodríguez)];Ducks, geese [Germany, 2019 (Plaza-Rodríguez)];Birds [Switzerland, May-Oct2018 (Zurfluh)]                                                         |
| Wildlife | Highly important                       | Amphenicols                                    | chloramphenicol             | Mouflons [Austria, Germany, Mar2012-Jan2016 (Loncaric)];Migratory rooks [Austria, Mar2013 (Loncaric)];Boars [Germany, 2016 (Plaza-Rodríguez)]                                                                                        |
| Wildlife | Highly important                       | Amphenicols                                    | florfenicol                 | Mouflons [Austria, Germany, Mar2012-Jan2016 (Loncaric)]                                                                                                                                                                              |
| Wildlife | Highly important                       | First-generation cephalosporins                | cefalotin                   | Mouflons [Austria, Germany, Mar2012-Jan2016 (Loncaric)]                                                                                                                                                                              |

|          |                  |                                         |                                |                                                                                                                                                                                                                                                                                                                                                              |
|----------|------------------|-----------------------------------------|--------------------------------|--------------------------------------------------------------------------------------------------------------------------------------------------------------------------------------------------------------------------------------------------------------------------------------------------------------------------------------------------------------|
| Wildlife | Highly important | First-generation cephalosporins         | cefazolin                      | Birds [Switzerland, May-Oct2018 (Zurfluh)]                                                                                                                                                                                                                                                                                                                   |
| Wildlife | Highly important | Penicillins                             | ampicillin                     | Rodents [Germany, 2007-2008 (Guenther)];Mouflons [Austria, Germany, Mar2012-Jan2016 (Loncaric)];Migratory rooks [Austria, Mar2013 (Loncaric)];Resident rooks [Austria, Mar2013 (Loncaric)];Boars [Germany, 2016 (Plaza-Rodríguez)];Roe deer [Germany, 2017 (Plaza-Rodríguez)];Ducks, geese [Germany, 2019 (Plaza-Rodríguez)]                                 |
| Wildlife | Highly important | Penicillins                             | piperacillin                   | Migratory rooks [Austria, Mar2013 (Loncaric)];Resident rooks [Austria, Mar2013 (Loncaric)]                                                                                                                                                                                                                                                                   |
| Wildlife | Highly important | Sulfonamides                            | sul1                           | Birds [Germany, 2011-2014 (Schaufler)]                                                                                                                                                                                                                                                                                                                       |
| Wildlife | Highly important | Sulfonamides                            | sul2                           | Birds [Germany, 2011-2014 (Schaufler)]                                                                                                                                                                                                                                                                                                                       |
| Wildlife | Highly important | Sulfonamides                            | sul3                           | Birds [Germany, 2011-2014 (Schaufler)]                                                                                                                                                                                                                                                                                                                       |
| Wildlife | Highly important | Tetracyclines                           | doxycycline                    | Mouflons [Austria, Germany, Mar2012-Jan2016 (Loncaric)]                                                                                                                                                                                                                                                                                                      |
| Wildlife | Highly important | Tetracyclines                           | tetracycline                   | Rodents [Germany, 2007-2008 (Guenther)];Mouflons [Austria, Germany, Mar2012-Jan2016 (Loncaric)];Migratory rooks [Austria, Mar2013 (Loncaric)];Boars [Germany, 2016 (Plaza-Rodríguez)];Roe deer [Germany, 2017 (Plaza-Rodríguez)];Ducks, geese [Germany, 2019 (Plaza-Rodríguez)]                                                                              |
| Wildlife | Highly important | Trimethoprim                            | trimethoprim                   | Boars [Germany, Feb2015-Dec2016 (Reinhardt)]                                                                                                                                                                                                                                                                                                                 |
| Wildlife | Highly important | Trimethoprim - sulfonamide combinations | trimethoprim /sulfamethoxazole | Rodents [Germany, 2007-2008 (Guenther)];Mouflons [Austria, Germany, Mar2012-Jan2016 (Loncaric)];Migratory rooks [Austria, Mar2013 (Loncaric)];Boars [Germany, 2016 (Plaza-Rodríguez)];Roe deer [Germany, 2017 (Plaza-Rodríguez)];Ducks, geese [Germany, 2019 (Plaza-Rodríguez)];Flies [Germany, Jul 16 (Wetzker)];Birds [Switzerland, May-Oct2018 (Zurfluh)] |
| Wildlife | Important        | Aminocyclitols                          | spectinomycin                  | Rodents [Germany, 2007-2008 (Guenther)]                                                                                                                                                                                                                                                                                                                      |
| Wildlife | Important        | Nitrofurantoin                          | nitrofurantoin                 | Birds [Switzerland, May-Oct2018 (Zurfluh)]                                                                                                                                                                                                                                                                                                                   |
| Wildlife | not listed       | Beta lactamases                         | ampC                           | Birds [Germany, 2011-2014 (Schaufler)]                                                                                                                                                                                                                                                                                                                       |
| Wildlife | not listed       | Beta lactamases                         | blaCTX-M                       | Birds [Germany, 2011-2014 (Schaufler)]                                                                                                                                                                                                                                                                                                                       |

|          |            |                                   |             |                                        |
|----------|------------|-----------------------------------|-------------|----------------------------------------|
| Wildlife | not listed | Beta lactamases                   | blaCTX-M-1  | Birds [Germany, 2011-2014 (Schaufler)] |
| Wildlife | not listed | Beta lactamases                   | blaCTX-M-15 | Birds [Germany, 2011-2014 (Schaufler)] |
| Wildlife | not listed | Beta lactamases                   | blaOXA      | Birds [Germany, 2011-2014 (Schaufler)] |
| Wildlife | not listed | Beta lactamases                   | blaOXA-1    | Birds [Germany, 2011-2014 (Schaufler)] |
| Wildlife | not listed | Beta lactamases                   | blaTEM      | Birds [Germany, 2011-2014 (Schaufler)] |
| Wildlife | not listed | Beta lactamases                   | blaTEM-1    | Birds [Germany, 2011-2014 (Schaufler)] |
| Wildlife | not listed | Extended spectrum beta lactamases | ESBL        | Flies [Germany, Jul 16 (Wetzker)]      |

## 2.5. Excluded studies

Studies excluded during the full-text screening (n = 33):

*Excluded due to occurrence was not investigated (n = 9)*

1. Falgenhauer L, Ghosh H, Guerra B, Yao Y, Fritzenwanker M, Fischer J, et al. Comparative genome analysis of IncHI2 VIM-1 carbapenemase-encoding plasmids of *Escherichia coli* and *Salmonella enterica* isolated from a livestock farm in Germany. *Veterinary Microbiology*. 2017;200:114-7.
2. Gallati C, Stephan R, Hächler H, Malorny B, Schroeter A, Nüesch-Inderbinen M. Characterization of *salmonella enterica* subsp. *Enterica* serovar 4,[5],12:I:- Clones isolated from human and other sources in Switzerland between 2007 and 2011. *Foodborne Pathogens and Disease*. 2013;10(6):549-54.
3. Hänel I, Müller E, Santamarina BG, Tomaso H, Hotzel H, Busch A. Antimicrobial Susceptibility and Genomic Analysis of *Aliarcobacter cibarius* and *Aliarcobacter thereius*, Two Rarely Detected *Aliarcobacter* Species. *Frontiers in Cellular and Infection Microbiology*. 2021;11.
4. Hindermann D, Gopinath G, Chase H, Negrete F, Althaus D, Zurfluh K, et al. *Salmonella enterica* serovar infantis from food and human infections, Switzerland, 2010-2015: Poultry-related multidrug resistant clones and an emerging ESBL producing clonal lineage. *Frontiers in Microbiology*. 2017;8(JUL).
5. Huehn S, Helmuth R, Bunge C, Guerra B, Junker E, Davies RH, et al. Characterization of pathogenic and resistant genome repertoire reveals two clonal lines in *Salmonella enterica* subsp. *enterica* serovar Paratyphi B (+)-tartrate positive. *Foodborne Pathogens and Disease*. 2009;6(4):431-43.
6. Schlüter A, Heuer H, Szczepanowski R, Forney LJ, Thomas CM, Pühler A, et al. The 64 508 bp IncP-1 $\beta$  antibiotic multiresistance plasmid pB10 isolated from a waste-water treatment plant provides evidence for recombination between members of different branches of the IncP-1 $\beta$  group. *Microbiology (Reading)*. 2003;149(11):3139-53.
7. Sood S, Awal RP, Wink J, Mohr KI, Rohde M, Stadler M, et al. *Aggregicoccus edonensis* gen. nov., sp. nov., an unusually aggregating myxobacterium isolated from a soil sample. *International Journal of Systematic and Evolutionary Microbiology*. 2015;65(3):745-53.
8. Steinmann J, Mamat U, Abda EM, Kirchhoff L, Streit WR, Schaible UE, et al. Analysis of phylogenetic variation of *Stenotrophomonas maltophilia* reveals human-specific branches. *Frontiers in Microbiology*. 2018;9(APR).
9. Zurfluh K, Power KA, Klumpp J, Wang J, Fanning S, Stephan R. A novel Tn3-like composite transposon harboring blaVIM-1 in *klebsiella pneumoniae* spp. *pneumoniae* Isolated from River Water. *Microbial Drug Resistance*. 2015;21(1):43-9.

*Excluded due to study designs: review, protocol, or abstract (n=4)*

1. Klare I, Konstabel C, Badstübner D, Werner G, Witte W. Occurrence and spread of antibiotic resistances in *Enterococcus faecium*. *International Journal of Food Microbiology*. 2003;88(2/3):269-90.
2. Savin M, Parcina M, Schmoger S, Kreyenschmidt J, Käsbohrer A, Hammerl JA. Draft genome sequences of *acinetobacter baumannii* isolates recovered from sewage water from a poultry slaughterhouse in Germany. *Microbiology Resource Announcements*. 2019;8(28).
3. Wareth G, Neubauer H. The animal-foods-environment interface of *Klebsiella pneumoniae* in Germany: an observational study on pathogenicity, resistance development and the current situation. *Veterinary Research*. 2021;52(16).
4. Wareth G, Neubauer H, Sprague LD. *Acinetobacter baumannii* – a neglected pathogen in veterinary and environmental health in Germany. *Veterinary Research Communications*. 2019;43(1).

*Excluded due to the sample not from environment (n = 8):*

1. Eikmeyer FG, Rademacher A, Hanreich A, Hennig M, Jaenicke S, Maus I, et al. Detailed analysis of metagenome datasets obtained from biogas-producing microbial communities residing in

biogas reactors does not indicate the presence of putative pathogenic microorganisms. *Biotechnology for Biofuels*. 2013;6(49):(4 April 2013).

2. Mateus-Vargas RH, Atanassova V, Reich F, Klein G. Antimicrobial susceptibility and genetic characterization of *Escherichia coli* recovered from frozen game meat. *Food microbiology*. 2017;63:164-9.
3. Noll M, Kleta S, Al-Dahouk S. Antibiotic susceptibility of 259 *Listeria monocytogenes* strains isolated from food, food-processing plants and human samples in Germany. *Journal of Infection and Public Health*. 2018;11(4):572-7.
4. Odenthal S, Akineden Ö, Usleber E. Extended-spectrum  $\beta$ -lactamase producing Enterobacteriaceae in bulk tank milk from German dairy farms. *International Journal of Food Microbiology*. 2016;238:72-8.
5. Schages L, Lucassen R, Wichern F, Kalscheuer R, Bockmühl D. The household resistome: frequency of  $\beta$ -lactamases, class 1 integrons, and antibiotic-resistant bacteria in the domestic environment and their reduction during automated dishwashing and laundering. *Applied and Environmental Microbiology*. 2020;86(23).
6. Schaufler K, Bethe A, Lübke-Becker A, Ewers C, Kohn B, Wieler LH, et al. Putative connection between zoonotic multiresistant extended-spectrum beta-lactamase (ESBL)-producing *Escherichia coli* in dog feces from a veterinary campus and clinical isolates from dogs. *Infection Ecology and Epidemiology*. 2015;5(1):1-5.
7. Schmidt JS, Kuster SP, Nigg A, Dazio V, Brilhante M, Rohrbach H, et al. Poor infection prevention and control standards are associated with environmental contamination with carbapenemase-producing Enterobacterales and other multidrug-resistant bacteria in Swiss companion animal clinics. *Antimicrobial Resistance and Infection Control*. 2020;9(1).
8. Spohr M, Rau J, Friedrich A, Klittich G, Fetsch A, Guerra B, et al. Methicillin-resistant *Staphylococcus aureus* (MRSA) in three dairy herds in southwest Germany. *Zoonoses and Public Health*. 2011;58(4):252-61.

*Excluded due to the focus of the study was antibiotic pollution (n = 1)*

Rodriguez-Mozaz S, Vaz-Moreira I, Varela Della Giustina S, Llorca M, Barceló D, Schubert S, et al. Antibiotic residues in final effluents of European wastewater treatment plants and their impact on the aquatic environment. *Environment International*. 2020;140.

*Excluded due to the study was an experiment (n = 1)*

Schmitt H, Stoob K, Hamscher G, Smit E, Seinen W. Tetracyclines and tetracycline resistance in agricultural soils: Microcosm and field studies. *Microbial Ecology*. 2006;51(3):267-76.

*Modelling of environmental concentrations (n = 1)*

Menz J, Olsson O, Kümmerer K. Antibiotic residues in livestock manure: does the EU risk assessment sufficiently protect against microbial toxicity and selection of resistant bacteria in the environment? *Journal of Hazardous Materials*. 2019;379.

*Excluded due to conducted in other country (n = 1)*

Pedroso AA, Hurley-Bacon AL, Zedek AS, Kwan TW, Jordan APO, Avellaneda G, et al. Can probiotics improve the environmental microbiome and resistome of commercial poultry production? *International Journal of Environmental Research and Public Health*. 2013;10(10):4534-59.

*Excluded because the results are not reported (n = 3)*

1. Borowiak M, Baumann B, Fischer J, Thomas K, Deneke C, Hammerl JA, et al. Development of a Novel mcr-6 to mcr-9 Multiplex PCR and Assessment of mcr-1 to mcr-9 Occurrence in Colistin-Resistant *Salmonella enterica* Isolates From Environment, Feed, Animals and Food (2011–2018) in Germany. *Frontiers in Microbiology*. 2020;11.

2. Pärnänen KMM, Narciso-da-Rocha C, Kneis D, Berendonk TU, Cacace D, Thi Thuy D, et al. Antibiotic resistance in European wastewater treatment plants mirrors the pattern of clinical antibiotic resistance prevalence. *Science Advances*. 2019;5(3):eaau9124.
3. Wengenroth L, Berglund F, Blaak H, Chifiriuc MC, Flach CF, Pircalabioru GG, et al. Antibiotic resistance in Wastewater Treatment Plants and transmission risks for employees and residents: the concept of the AWARE study. *Antibiotics*. 2021;10(5).

*Excluded due to study of direct surroundings of farm animals (n = 5)*

1. Dahms C, Hübner NO, Cuny C, Kramer A. Occurrence of methicillin-resistant *Staphylococcus aureus* in farm workers and the livestock environment in Mecklenburg-Western Pomerania, Germany. *Acta veterinaria Scandinavica*. 2014;56:53.
2. Hille K, Roschanski N, Ruddat I, Woydt J, Hartmann M, Rösler U, et al. Investigation of potential risk factors for the occurrence of *Escherichia coli* isolates from German fattening pig farms harbouring the mcr-1 colistin-resistance gene. *International Journal of Antimicrobial Agents*. 2018;51(2):177-80.
3. Klein-Jöbstl D, Sofka D, Iwersen M, Drillich M, Hilbert F. Multilocus sequence typing and antimicrobial resistance of *Campylobacter jejuni* isolated from dairy calves in Austria. *Frontiers in Microbiology*. 2016;7(FEB).
4. Müller E, Abdel-Glil MY, Hotzel H, Hänel I, Tomaso H. *Aliarcobacter butzleri* from water poultry: Insights into antimicrobial resistance, virulence and heavy metal resistance. *Genes*. 2020;11(9):1-16.
5. Müller E, Hotzel H, Linde J, Hänel I, Tomaso H. Antimicrobial Resistance and in silico Virulence Profiling of *Aliarcobacter butzleri* Strains From German Water Poultry. *Frontiers in Microbiology*. 2020;11.
